# Supplementary material for: Integrative Analysis Using Module-Guided Random Forests Reveals Correlated Genetic Factors Related to Mouse Weight
Source: PubMed Central journal article supplement (PMC3591263; doi:10.1371/journal.pcbi.1002956), 2013-03-07
Supplement: pcbi.1002956.s019.pdf [file pcbi.1002956.s019.pdf]

# Integrative analysis using module-guided Random Forests reveals correlated genetic factors related to mouse weight

Zheng Chen and Weixiong Zhang

## Text S1. Other Regression Models

Here we briefly describe the models we evaluated in this work. To compare the variable importance from the following methods, we centered the data at 0 mean and scaled them to 1 standard deviation because the weights of variables are dependent on the scale of variables in those methods.

**Group lasso.** The  $l_1$ -regularized linear regression, a.k.a. lasso [1], is one of the most popular methods for high dimensional regression problems. It models the continuous response as linear functions of input variables. However, with the presence of correlated variables, lasso can only include one or few variables from every group of correlated variables because correlated variables are redundant for the model and will be penalized by the  $l_1$ -norm term. Group lasso [2], on the other hand, ensure the sparsity of weight parameters by group, where every group of variables must either be included in the model or be discarded entirely. The variable importance in group lasso is given by:

$$w_{grplasso} = \arg \min_w \left\| y - \sum_{j=1}^p X_j w_j \right\|_2^2 + \lambda \sum_{g=1}^{|G|} \sqrt{d_g} \| w_{I_g} \|_2,$$

where  $d_g$  accounts for different group size,  $I_g$  indicates the group index of a variable, and  $\| \cdot \|_2$  is the Euclidean norm. As  $d_g = 1$  for every group  $g$ , group lasso reduce to simple lasso. We use the ADMM [3] implementation of group lasso in our experiments.

**Elastic net.** While enjoying a similar sparsity of representation as in lasso, elastic net also encourages correlated to be grouped together [4]. Unlike group

lasso, the variables grouping structure is not required as input in elastic net and it will attempt to learn it along the way. The variable importance is given by:

$$w_{elasticnet} = \arg \min_w w^T \left( \frac{X^T X + \lambda_2 I}{I + \lambda_2} \right) w - 2y^T Xw + \lambda_1 |w|,$$

As  $\lambda_2 = 0$ , the elastic net reduces to lasso regression. The hyperparameters  $\lambda_1$  and  $\lambda_2$  essentially control the  $l_1$  and  $l_2$  penalty, respectively. We use the *glm\_net* [5] implementation of elastic net.  $\lambda_1$  and  $\lambda_2$  are all determined by cross-validation.

**SVR-RFE.** Guyon et al. [6] introduced the recursive feature elimination using support vector machines (SVM-RFE) for gene selection. It has been widely applied to perform feature selection in many biological studies. For regression tasks with continuous response variable, a regression version of SVM, support vector regressor (SVR) can be used. Kernel tricks can also be easily applied to model non-linear response. In the non-linear case, we followed the same procedure introduced in [6], where variables were ranked by their change in cost function caused by removing itself from the data. The change of cost function for variable  $v_i$  is defined as:

$$DJ(v_i) = \frac{1}{2} \alpha^T H \alpha - \frac{1}{2} \alpha^T H(-i) \alpha,$$

where  $\alpha$  is the learnt SVM dual variables,  $H$  is the matrix with elements  $y_h y_k K(\mathbf{x}_h, \mathbf{x}_k)$ ,  $K$  is a kernel function, and the notation  $(-i)$  means that variable  $v_i$  has been removed. In our experiments, we use the radial basis function (RBF) kernel with kernel parameters chosen according to cross-validation.

## Reference

1. Tibshirani R (1996) Regression shrinkage and selection via the lasso. *Journal of the Royal Statistical Society Series B Methodological* 58: 267–288.
2. Yuan M, Lin Y (2006) Model selection and estimation in regression with grouped variables. *Journal of the Royal Statistical Society - Series B: Statistical Methodology* 68: 49–67.
3. Boyd S (2010) Distributed Optimization and Statistical Learning via the Alternating Direction Method of Multipliers. *Foundations and Trends in Machine Learning* 3: 1–122.
4. Zou H, Hastie T (2005) Regularization and variable selection via the elastic net. *Journal of the Royal Statistical Society - Series B: Statistical Methodology* 67: 301–320.
5. Friedman J, Hastie T, Tibshirani R (2010) Regularization paths for generalized linear models via coordinate descent. *Journal of Statistical Software* 33: 1–22.
6. Guyon I, Weston J, Barnhill S, Vapnik V (2002) Gene Selection for Cancer Classification using Support Vector Machines. *Machine Learning* 46: 389–422.
