# Supplementary material for: Integrative Analysis Using Module-Guided Random Forests Reveals Correlated Genetic Factors Related to Mouse Weight
Source: PLOS journal article supplement (doi:10.1371/journal.pcbi.1002956), 2013-03-07
Supplement: S20 (10.1371/journal.pcbi.1002956.s020) [file journal.pcbi.1002956.s020]

301 Moved Permanently

# Moved Permanently

The document has moved here.

---

Apache Server at www.ploscompbiol.org Port 80
