# Supplementary material for: Integrative Analysis Using Module-Guided Random Forests Reveals Correlated Genetic Factors Related to Mouse Weight
Source: PLoS Comput Biol. 2013 Mar 7;9(3):e1002956. doi: 10.1371/journal.pcbi.1002956 (PMC3591263; doi:10.1371/journal.pcbi.1002956)
Supplement: Table S1 — p-values of paired t-test when comparing RMSE of mgRF with RMSE of other methods (Group lasso, Elastic Net, SVR, and RF). (XLSX) [file pcbi.1002956.s006.xlsx]

## Sheet: Table S1A
Table S1 p-values of paired t-test when comparing RMSE of mgRF-RFE with RMSE of other methods (Group lasso, Elastic Net, SVR, and RF)
	Genotype-only	Expression-Only	Combined
Group lasso	1.63×10-59	4.11×10-65	4.37×10-54
Elastic Net	9.53×10-56	5.17×10-78	1.29×10-72
SVR	3.24×10-33	3.21×10-39	1.45×10-40
RF	6.30×10-19	3.83×10-16	2.52×10-13
