# Supplementary material for: Integrative Analysis Using Module-Guided Random Forests Reveals Correlated Genetic Factors Related to Mouse Weight
Source: PLoS Comput Biol. 2013 Mar 7;9(3):e1002956. doi: 10.1371/journal.pcbi.1002956 (PMC3591263; doi:10.1371/journal.pcbi.1002956)
Supplement: Table S3 — Network module structure in the SNP-only data. (XLSX) [file pcbi.1002956.s008.xlsx]

## Sheet: SNP modules
Table S3. Network Module Structure in SNP-only data
SNP ID	UCSC ID	Module ID	Chromosome	Location
p45178	rs3683945	0	1	3205573
p45787	rs3674785	0	1	4872910
p44584	rs3667692	0	1	9813942
p45736	rs3724763	0	1	11371968
p45644	rs3687812	0	1	11567059
p45301	rs3669485	0	1	14109193
p46277	rs3719964	0	1	15934359
p45177	rs3671256	0	1	16448703
p44900	rs3658044	0	1	19437342
p45342	rs3720411	0	1	20222060
p45180	rs3691092	1	1	22954427
p46146	rs3695916	1	1	23448352
p44774	rs4222215	1	1	24168425
p45506	rs3709207	1	1	26686415
p45646	rs3692609	1	1	27604256
p46044	rs3695988	1	1	30081784
p44639	rs3690508	1	1	33928761
p45162	rs3690990	1	1	33928797
p46209	rs3709457	1	1	34863540
p46015	rs3687379	2	1	36121735
p46047	rs4151913	2	1	37394700
p44640	rs3707984	2	1	39198646
p44775	rs4222297	2	1	39687538
p45884	rs3665127	2	1	40101654
p46399	rs3708475	2	1	41372882
p45184	rs4222308	2	1	41542995
p45647	rs3706173	2	1	42165776
p46222	rs3667075	2	1	42612937
p45923	rs3668645	3	1	46544664
p46341	rs3725338	3	1	48487110
p45925	rs3724092	3	1	51350652
p45649	rs3724707	3	1	51350744
p45991	rs3725866	3	1	51350932
p45340	rs3690322	4	1	64260003
p45344	rs3726861	4	1	66285531
p45861	rs3654452	4	1	66285796
p45017	rs3665792	4	1	69361671
p45462	rs3722564	4	1	73681550
p44667	rs3665947	4	1	74637691
p45334	rs3689327	4	1	77504877
p44585	rs3703285	4	1	79301875
p45181	rs3706465	5	1	82811325
p45790	rs3678377	5	1	87673583
p44630	rs3723062	5	1	87864028
p46141	rs3663759	5	1	88086628
p44586	rs3719888	5	1	93218739
p45016	rs3664800	5	1	93743442
p46041	rs3688242	5	1	96124422
p44629	rs3694065	6	1	102592465
p44669	rs3717264	6	1	105501457
p44901	rs3664662	6	1	106876975
p45733	rs3658965	6	1	108085581
p46102	rs3715814	6	1	114288343
p45343	rs3725808	6	1	116834099
p45507	rs3719973	6	1	121619311
p45920	rs3659590	6	1	127612096
p45182	rs3717377	6	1	128643654
p45788	rs3677375	6	1	135362062
p45339	rs3678662	6	1	135361855
p44670	rs4222665	6	1	138302220
p46143	rs3677464	7	1	142046673
p46382	rs3682831	7	1	142983873
p46339	rs3698565	7	1	145318082
p45504	rs3657970	7	1	146245779
p45276	rs3701166	7	1	146507378
p46145	rs3690582	7	1	150441903
p45175	rs3655459	7	1	153235296
p45734	rs3680116	7	1	153239887
p45461	rs3714704	7	1	159284714
p46408	rs3716472	7	1	159382279
p45508	rs4135672	7	1	164627409
p45886	rs3684974	7	1	165191019
p45792	rs3689151	7	1	165406294
p45338	rs3668491	8	1	172470398
p45924	rs3720335	8	1	172610033
p46147	rs3696419	8	1	173602599
p45860	rs3654285	8	1	176850283
p45505	rs3659655	8	1	177274237
p45179	rs3685549	8	1	178361085
p44992	rs3692513	9	1	187221795
p45008	rs3708652	9	1	187222172
p44655	mCV22542926	9	1	190507782
p45782	mCV22849619	9	1	190541821
p45169	mCV22849612	9	1	190541993
p44903	rs3704023	9	1	190752535
p45639	mCV23599971	9	1	190826665
p44659	mCV23599683	9	1	190832222
p45019	rs3679166	9	1	191147240
p44628	rs3655423	10	1	192167994
p44894	mCV23993168	10	1	192202561
p44661	mCV23993161	10	1	192202730
p44769	mCV23205157	10	1	193762965
p45336	mCV23204820	10	1	193774325
p45013	mCV23990401	10	1	193823272
p44521	mCV23990376	10	1	193825559
p44771	mCV23934048	10	1	193959623
p44849	rs3708442	10	1	196319296
p44772	rs3708508	10	1	196319319
p45793	rs3691121	10	1	197926908
p44815	rs3676722	11	2	6046496
p44735	rs3688854	12	2	20560990
p46244	rs3715481	12	2	20565884
p46306	rs3723453	13	2	36914702
p44935	rs3666019	13	2	37737310
p44703	rs3665986	13	2	38918843
p45069	rs3672727	13	2	41245316
p46419	rs3676558	13	2	42932418
p45235	rs3721831	13	2	46379753
p45873	rs3678632	14	2	51560639
p45963	rs3720957	14	2	51732429
p45745	rs3658919	14	2	54360018
p45066	rs3655184	14	2	56773121
p46356	rs3662347	14	2	56798473
p45960	rs3707138	14	2	57436457
p45393	rs3726227	15	2	69134289
p45395	rs4136610	15	2	70441766
p45068	rs3670752	15	2	71715896
p44817	rs4136564	15	2	74608070
p46174	rs3719468	15	2	75483942
p45470	rs3680028	16	2	80000742
p45746	rs3667007	16	2	82472391
p45689	rs3715573	16	2	82510256
p45962	rs3712306	16	2	84841249
p44939	rs3721476	16	2	85974373
p44985	rs3698393	16	2	87170021
p46305	rs3668989	16	2	90757727
p46172	rs3715323	16	2	89946728
p45541	rs3672274	17	2	96382393
p46421	rs3689502	17	2	98344747
p46271	rs3699821	17	2	99503103
p45829	rs3719943	17	2	99619107
p45232	rs3685454	17	2	101258933
p44605	rs3654365	17	2	102167500
p45315	rs3714835	17	2	106472683
p45540	rs3656787	18	2	2830453
p45387	rs3022892	18	2	110129455
p46002	rs3698058	18	2	111525176
p46282	rs3723200	18	2	114898988
p45389	rs3663941	18	2	118075379
p44858	rs3149884	18	2	118812844
p45153	rs3669388	18	2	119182532
p45765	rs3658927	19	2	121215119
p45542	rs3686617	19	2	122795772
p46175	rs3726517	19	2	125994115
p45747	rs3708635	19	2	126133136
p45233	rs3689994	19	2	126148354
p45313	rs3680660	19	2	127948030
p46173	rs3718550	19	2	129526552
p44514	rs3671635	19	2	133684721
p45390	rs3682725	20	2	136465856
p45236	rs4135727	20	2	146116462
p45872	rs3674082	20	2	146363370
p45684	rs3654835	20	2	149329872
p45959	rs3676033	20	2	149841609
p44501	rs3690044	21	2	153321940
p44754	rs3683092	21	2	154573514
p45314	rs3687374	21	2	155689840
p45071	rs3691210	21	2	158620930
p45766	rs3662897	21	2	159724262
p45067	rs3667162	22	2	162067072
p46402	rs3692024	22	2	162825379
p44938	rs3692104	22	2	162825424
p45070	rs3675564	22	2	165004136
p45391	rs3687058	22	2	169492828
p44933	rs3656991	22	2	169816917
p44813	rs3665916	22	2	172173629
p44814	rs3673248	23	2	173450033
p44500	rs3673141	23	2	178528579
p44704	rs4139310	23	2	179090870
p45130	rs3703298	23	2	179772115
p45474	rs3714327	24	3	7884337
p45833	rs4223709	24	3	8633827
p45131	rs3668064	24	3	9401619
p44818	rs3688496	24	3	15582435
p46177	rs3660588	25	3	31239856
p46272	rs3702402	25	3	33091401
p45545	rs3687193	25	3	33927069
p45964	rs3664070	25	3	34878780
p45692	rs3701286	25	3	36186746
p44708	rs3721455	25	3	38546455
p46359	rs3725706	25	3	42842111
p46213	rs3684206	25	3	47268280
p46334	rs3685905	25	3	47433061
p46178	rs3678630	25	3	49615067
p44736	rs3724545	25	3	52183351
p45400	rs3694611	25	3	53016412
p45897	rs3665395	25	3	54659106
p45967	rs4223971	26	3	56459749
p44515	rs3692987	26	3	60705741
p46077	rs3715395	26	3	61712879
p46034	rs3661738	26	3	63337168
p45397	rs3672601	26	3	63367171
p45694	rs3715204	26	3	70698810
p45241	rs3714575	26	3	71644696
p46112	rs3717453	26	3	72727445
p46111	rs3680433	26	3	72782675
p46033	rs3671511	26	3	74493655
p45546	rs3714671	27	3	79883055
p44944	rs3705680	27	3	80346507
p45317	rs3706170	27	3	82397788
p45911	rs3707356	27	3	82398026
p45620	rs3704498	27	3	83193669
p44942	rs3699123	28	3	84230694
p45877	rs3705767	28	3	85087447
p46374	rs3667053	28	3	87075901
p45237	rs3660030	28	3	87942102
p44876	rs3715579	28	3	87950899
p45543	rs3667802	28	3	89472011
p45425	rs4226499	29	3	93019750
p45966	rs4135965	30	3	95925277
p45155	rs3708699	30	3	95920207
p44548	rs3717575	30	3	98190227
p45473	rs3708129	30	3	101780122
p45691	rs3669106	30	3	104362354
p44705	rs3671622	30	3	105479560
p45834	rs4224158	31	3	108133659
p45078	rs3686353	31	3	110302430
p44707	rs3676545	31	3	113534605
p45832	rs3711702	31	3	114593276
p46126	rs3671099	31	3	117285845
p45401	rs4136035	31	3	119452732
p45074	rs3664868	31	3	121306342
p45965	rs3688520	32	3	124148180
p44709	rs4136374	32	3	126080226
p45914	rs3677731	32	3	126997737
p45154	rs3704417	32	3	127002552
p46375	rs3706670	32	3	127018959
p46127	rs3707706	32	3	127530826
p44943	rs3702789	32	3	130131324
p46075	rs3698974	32	3	130584864
p45544	rs3679962	32	3	131660574
p45597	rs4136518	32	3	135612452
p45076	rs3676561	33	3	140122485
p46391	rs3667681	33	3	141515871
p45239	rs3683790	33	3	143328552
p45396	rs3654931	33	3	145545340
p45399	rs3681718	33	3	146407141
p44821	rs3722980	33	3	149914187
p44737	rs3724708	33	3	152115605
p44756	rs3701592	33	3	152472660
p45876	rs3704022	33	3	154326213
p45693	rs3714147	34	3	159360773
p44989	rs3697892	34	3	160748085
p45695	rs3716357	34	3	161220460
p45002	rs3695715	35	4	3649823
p45835	rs3677005	35	4	4498975
p45838	rs3716318	35	4	6157796
p45698	rs3668821	35	4	7792904
p45554	rs3713068	35	4	10008623
p45451	rs3673940	35	4	10707510
p46114	rs3709725	35	4	17438372
p46360	rs3669979	35	4	17479122
p45700	rs3680125	35	4	18516946
p45453	rs3708026	35	4	22874683
p46027	rs3701432	36	4	29303789
p44949	rs3705575	36	4	32108690
p45001	rs3664379	36	4	32801368
p45696	rs3655655	36	4	6995755
p45969	rs3682271	36	4	34779564
p45836	rs3677546	36	4	39035457
p45552	rs3672405	36	4	39552451
p45478	rs3674824	37	4	42362145
p45331	rs4138960	37	4	42362195
p44859	rs3698283	37	4	42474649
p46082	rs3689193	37	4	43212164
p44823	rs3707178	37	4	46650694
p45551	rs3668284	37	4	46686959
p46183	rs3714032	37	4	49575046
p44946	rs3673502	37	4	52443028
p46113	rs3699453	38	4	55256150
p45403	rs3670712	38	4	55261704
p45087	rs3719355	38	4	56509818
p45477	rs3671277	38	4	59199808
p44565	rs3690581	38	4	61271976
p44950	rs3720899	38	4	61540102
p44549	rs3724999	38	4	61723788
p45494	rs3670962	39	4	86073168
p46310	rs3659947	39	4	86134722
p45480	rs3713554	39	4	87434882
p45553	rs3682389	39	4	89180038
p46085	rs4136370	39	4	90096105
p45479	rs3694739	39	4	93178076
p45549	rs3663299	39	4	93480723
p46287	rs3659791	39	4	94996245
p46220	rs3659825	39	4	94996267
p46133	rs3704040	39	4	95194270
p46081	rs3671527	40	4	98133797
p44713	rs3679343	40	4	101293545
p45878	rs3724670	40	4	101745799
p44947	rs3677735	40	4	103076117
p46004	rs3722695	40	4	104533141
p45476	rs3670398	41	4	106594943
p45402	rs3664065	41	4	107424123
p45550	rs3664637	41	4	107424225
p45598	rs3670382	41	4	109700855
p45085	rs3706233	41	4	110175830
p45490	rs3726535	41	4	111621658
p45703	rs3694396	41	4	113375313
p46083	rs3689378	41	4	115856020
p46084	rs3695349	41	4	118411707
p45407	rs4224744	41	4	119909005
p45968	rs3666537	41	4	125386217
p45246	rs3714117	42	4	131735382
p46179	rs3661970	42	4	136928483
p45405	rs3686214	42	4	138429189
p44502	rs4151918	42	4	140982083
p46128	rs3684126	42	4	141705328
p44647	rs3697695	42	4	143825015
p44711	rs3675987	42	4	146398173
p45082	rs3669806	42	4	146936026
p45970	rs3686555	42	4	149190542
p45084	rs3693138	42	4	152818953
p44990	rs3720634	42	4	154020953
p45974	rs3666998	43	5	7462861
p46311	rs3708118	43	5	10886572
p45296	rs3671575	44	5	20432146
p45092	rs3690874	44	5	20439566
p46028	rs3705209	44	5	24710642
p45134	rs3670423	44	5	26623176
p44952	rs3671062	44	5	26623071
p44955	rs3718492	44	5	30401978
p45297	rs3679280	44	5	30858921
p45562	rs3723722	45	5	35824520
p45411	rs3703261	45	5	38381076
p46441	rs3725107	45	5	9672068
p44739	rs4140247	45	5	46981188
p45975	rs3672859	45	5	47031077
p45409	rs3681071	45	5	49031193
p44825	rs3704725	45	5	50628972
p46116	rs3688942	46	5	54230318
p46327	rs3713492	46	5	55116872
p45414	rs3713195	46	5	58652173
p46249	rs3707624	46	5	61741868
p45879	rs3679606	46	5	61746108
p45249	rs3711950	46	5	63256554
p44714	rs3656989	46	5	65498428
p46273	rs3671517	47	5	66698984
p44953	rs3684754	47	5	66767341
p45322	rs3718145	47	5	72244982
p46130	rs4138743	47	5	73109673
p45840	rs3672514	47	5	74189078
p44503	rs3669240	47	5	77205145
p45623	rs3720626	47	5	77501575
p45294	rs3658150	47	5	80396488
p45295	rs3669458	47	5	88738812
p45250	rs3722733	47	5	80475340
p44956	rs3721607	47	5	82805397
p45839	rs3667334	47	5	83318635
p44954	rs3688276	47	5	86426180
p46184	rs3667067	47	5	88604294
p45247	rs3686635	47	5	89606366
p45750	rs3686672	47	5	89606390
p45561	rs3716445	47	5	91095097
p44612	rs3680521	48	5	93249787
p44862	rs3707832	48	5	96572366
p45560	rs3706737	48	5	96625963
p45091	rs3688859	48	5	43684803
p44824	rs3699728	48	5	100541217
p45972	rs3657782	48	5	102147106
p44860	rs3683865	48	5	102163313
p45973	rs3663308	49	5	103743924
p45133	rs3658120	49	5	106078051
p45563	rs4225393	49	5	106749378
p44716	rs3725274	49	5	108893602
p45705	rs3653831	49	5	110101891
p44504	rs3719767	49	5	114227083
p44609	rs3662161	49	5	116451271
p45328	rs3654066	49	5	117480481
p45558	rs3662726	50	5	123206370
p44573	rs3711485	50	5	124600205
p44738	rs3688355	50	5	127876939
p45559	rs3689007	50	5	127877069
p45977	rs3695212	50	5	131346081
p44517	rs3698092	51	5	135076050
p44550	rs4225539	51	5	137809239
p44861	rs3700374	51	5	140894688
p45251	rs4225559	51	5	143102033
p45093	rs3696754	51	5	143395538
p45319	rs3713156	51	5	144954279
p45318	rs3710365	52	5	147817581
p45410	rs3692702	52	5	149054929
p45255	rs4225658	53	6	5156037
p44741	rs3679060	53	6	6692648
p45096	rs3681549	53	6	6692990
p44505	rs3669958	53	6	7445315
p45753	rs4137688	53	6	14331436
p45565	rs3664283	53	6	17027696
p45844	rs3684277	54	6	23123183
p44830	rs3671709	54	6	25682079
p45979	rs3693271	54	6	26315220
p44718	rs3706286	54	6	28618042
p45095	rs3677815	54	6	29890034
p45253	rs3676393	54	6	32197690
p44831	rs3674895	54	6	34503501
p46256	rs3716901	54	6	35796874
p45632	rs3665049	55	6	35958121
p45004	rs3670489	55	6	36289036
p46088	rs3694454	55	6	38220375
p44829	rs3665191	55	6	43959876
p44717	rs3703696	55	6	43983689
p45771	rs3666470	55	6	45207106
p46221	rs3654586	55	6	45208882
p44480	rs4225867	55	6	48917361
p45708	rs3698072	55	6	49899519
p44650	rs3688920	56	6	54074575
p46315	rs3687179	56	6	55979806
p45845	rs3697325	57	6	64757377
p44522	mCV24559422	57	6	65569981
p44579	mCV24559423	57	6	65569990
p44656	mCV22576656	57	6	65621387
p45456	rs3723437	57	6	72337188
p44614	rs3665567	57	6	72337480
p45568	rs3719988	57	6	74795771
p45493	rs3672664	57	6	76484951
p46190	rs3706039	57	6	78186182
p46006	rs4221995	57	6	87839197
p44719	rs4226061	57	6	88047043
p45567	rs3671004	57	6	90152370
p44651	rs3716206	57	6	94426335
p46207	rs3665519	57	6	94730416
p46191	rs3720133	57	6	96075200
p45416	rs3694444	57	6	103127162
p45455	rs3718253	57	6	107632037
p45482	rs3722224	57	6	110406053
p45627	rs3722772	57	6	113114482
p44832	rs3707217	57	6	115622532
p45601	rs3722915	57	6	117492098
p45418	rs4226214	57	6	117571842
p44518	rs3707602	57	6	120629271
p45566	rs3669456	57	6	121393389
p46252	rs3677013	57	6	121420069
p45846	rs3705704	57	6	124411036
p44960	rs4226262	57	6	128802731
p46131	rs3696743	58	6	131484207
p45843	rs3655878	58	6	135039865
p45481	rs3680603	58	6	135425580
p44766	rs3681895	58	6	135425780
p45298	rs3712962	58	6	140016513
p44615	rs3679077	58	6	140980042
p46188	rs3676517	58	6	141657709
p45707	rs3677570	59	6	146176128
p45569	rs3725661	59	6	148189629
p44828	rs3659280	59	6	150258861
p44616	rs3719311	60	7	27877364
p45483	rs3703711	60	7	31771072
p44553	rs3689879	60	7	37311670
p44744	rs3722844	60	7	38882070
p44507	rs3664333	60	7	38881896
p45980	rs3673884	60	7	42180061
p45604	rs3720603	60	7	44153591
p45259	rs3688093	60	7	48065324
p45260	rs3696018	60	7	38629351
p45628	rs3665973	60	7	51891614
p46316	rs3655797	60	7	53970481
p44961	rs3680576	60	7	55954436
p45135	rs3717935	60	7	56988612
p44758	rs3654962	60	7	58521754
p45161	rs3713031	61	7	61661426
p45457	rs3706672	61	7	64201075
p45421	rs3677657	61	7	66968443
p44722	rs3726780	61	7	68738640
p45603	rs3693952	61	7	69306358
p45101	rs3713432	61	7	70467069
p45602	rs3690268	62	7	74838666
p44834	rs3687801	62	7	75468573
p44552	rs3664330	62	7	76526294
p44638	rs3680715	62	7	76993277
p46218	rs3690467	62	7	43761818
p45903	rs3696213	62	7	77941624
p45158	rs3658777	62	7	4032506
p46446	rs3672246	62	7	84507381
p45099	rs3692018	62	7	88887329
p45571	rs3660732	63	7	89817093
p45321	rs3714598	63	7	92862708
p46029	rs3656411	63	7	93450694
p44880	rs3667300	63	7	94613961
p45484	rs3717789	63	7	95861696
p44963	rs3711721	63	7	99479902
p45712	rs3686975	63	7	102024021
p44653	rs3708100	63	7	104103868
p46443	rs3692623	63	7	105440388
p44865	rs3657482	63	7	106052115
p44962	rs3705945	63	7	107427028
p44881	rs3709679	63	7	112108381
p44742	rs3687061	63	7	119758047
p45714	rs3697227	63	7	119762495
p45423	rs3700735	64	7	124759027
p45323	rs3701133	65	7	131805648
p45424	rs3702235	65	7	131805808
p44866	rs3714636	66	7	137170589
p45103	rs3657963	67	8	17278974
p44967	rs3699118	67	8	19261701
p46096	rs3725097	67	8	20259751
p44868	rs4135461	67	8	21571967
p45263	rs3666112	67	8	21903915
p46397	rs3708695	67	8	22195999
p45428	rs3720644	67	8	22757225
p45267	rs3684644	67	8	25432575
p45485	rs3709090	67	8	27147273
p45718	rs3672582	67	8	29867041
p45265	rs3684114	68	8	30913875
p46098	rs4227112	68	8	32787014
p45772	rs3726003	68	8	34612243
p44867	rs3678454	68	8	35941637
p45851	rs3709888	68	8	36252280
p45110	rs4139770	68	8	38283715
p46424	rs3708225	68	8	40892790
p46092	rs3659789	69	8	55720527
p46286	rs3715297	69	8	55913293
p45717	rs3663761	69	8	56373165
p46137	rs3692524	69	8	58657137
p46261	rs3707439	69	8	58657340
p46097	rs4139625	69	8	59747830
p45105	rs3672639	69	8	61036013
p45754	rs3680085	70	8	62599686
p46193	rs3706727	70	8	64198448
p45107	rs3707132	70	8	66195062
p44618	rs4227192	70	8	66366080
p46009	rs3658748	70	8	68216440
p46216	rs4136202	70	8	69263942
p45327	rs3676851	70	8	70186982
p44555	rs3667475	70	8	72010708
p45109	rs3722665	70	8	73082909
p44840	rs3688799	71	8	75040969
p46192	rs3690549	71	8	77643161
p45755	rs3699145	71	8	78643760
p45574	rs3685476	71	8	83091949
p46132	rs3653966	71	8	83822804
p45984	rs3703660	71	8	86150626
p44617	rs3700000	71	8	88025615
p45850	rs3705922	72	8	94166120
p45268	rs3696312	72	8	97760060
p45266	rs3684464	72	8	101880983
p46208	rs3670293	72	8	102196231
p46094	rs3705275	72	8	104872283
p45136	rs3705920	72	8	104872434
p44482	rs3691375	73	8	111047790
p44966	rs3685487	74	8	115915940
p45459	rs3700124	74	8	115916009
p44838	rs3671292	74	8	117178249
p45458	rs3665212	74	8	118591379
p44839	rs3686697	74	8	118861046
p45264	rs3675125	75	8	124095847
p45104	rs3667780	75	8	124393690
p46136	rs3668371	75	8	124393759
p44723	rs3689358	75	8	125872394
p45633	rs3702465	75	8	126976208
p45159	rs4227474	75	8	127869089
p45106	rs3699035	75	8	129963229
p46036	rs3672918	75	8	130246777
p46215	rs3666746	75	8	130484856
p45640	mCV25073238	76	9	10738751
p45502	mCV24465575	76	9	12769584
p44658	mCV23201775	76	9	13638149
p44576	mCV23201786	76	9	13638993
p45170	mCV23202095	76	9	13643315
p45335	mCV23202466	76	9	13703952
p44523	mCV24962297	76	9	13803082
p45269	rs3655898	77	9	34388373
p45580	rs4227588	77	9	35891258
p45630	rs3719607	77	9	37976727
p46031	rs3688291	77	9	39157360
p46197	rs3714664	77	9	42248144
p45722	rs3674874	77	9	43783064
p44974	rs3693351	77	9	46724226
p45112	rs3673816	77	9	49025061
p45270	rs3661445	77	9	49789003
p44889	rs3670024	77	9	49791898
p45723	rs3690408	77	9	50039618
p44762	rs3693234	78	9	52818761
p45910	rs3701279	78	9	53753165
p44746	rs4138776	78	9	54104600
p46099	rs3723670	78	9	54574803
p44882	rs3689326	78	9	56040261
p44972	rs3676114	78	9	61301639
p45882	rs3685575	78	9	61737163
p45114	rs3714012	79	9	63506850
p44726	rs3656848	79	9	65725270
p44619	rs3664300	79	9	66825666
p44870	rs3664533	79	9	68280310
p45577	rs3681667	79	9	70414348
p45728	rs3726762	79	9	73979415
p44575	rs3693209	79	9	74128642
p44844	rs3703712	79	9	75276306
p45726	rs3714202	79	9	77999312
p44973	rs3685573	79	9	78781035
p46262	rs3721677	80	9	82096624
p44567	rs3654196	80	9	82846798
p45857	rs4139986	80	9	83702505
p45137	rs3672897	80	9	86450563
p45855	rs3695050	80	9	87908849
p45429	rs3669564	80	9	90842801
p45725	rs3705632	80	9	90936256
p44728	rs3709303	80	9	92351263
p45430	rs3693091	80	9	92792240
p45272	rs3712219	81	9	96893587
p46012	rs3716005	81	9	97396801
p44843	rs3689336	81	9	98807592
p44621	rs3699740	81	9	100897787
p45881	rs3672865	81	9	104472259
p45727	rs3717183	81	9	104474903
p44845	rs4138027	81	9	107830422
p45486	rs3655712	81	9	109301242
p44556	rs4139849	81	9	110253134
p44975	rs3709787	81	9	111385765
p46405	rs3656332	82	9	117677507
p45774	rs3656884	82	9	117677578
p45986	rs3678712	82	9	117966678
p45629	rs3658244	82	9	118973177
p44510	rs3687724	82	9	123303391
p45880	rs3664397	82	9	125607467
p46016	rs3659700	83	10	4517292
p46367	rs3660611	83	10	5298921
p46411	rs3708275	83	10	6368262
p46210	rs3673471	83	10	9121622
p45930	rs3708450	83	10	11211519
p46344	rs3693867	83	10	13268036
p45651	rs3680457	83	10	14484008
p44569	rs3677768	83	10	18358346
p45928	rs3688363	83	10	20834699
p45139	rs3679120	83	10	23805229
p45511	rs3672342	83	10	26582526
p45653	rs3719045	83	10	27987195
p46049	rs3679201	84	10	48605223
p45025	rs3696307	84	10	55861731
p45347	rs3682060	84	10	58821364
p44731	rs3676909	84	10	58827145
p44673	rs3723140	84	10	68383630
p45023	rs3661840	85	10	70030302
p45797	rs3690226	85	10	71259450
p44526	rs3679452	85	10	84135431
p44560	rs3667599	85	10	84953516
p46293	rs3721306	85	10	84985933
p45302	rs3691945	85	10	87540073
p45187	rs3686681	85	10	96429319
p45277	rs3664737	85	10	96473451
p45026	rs3704401	86	10	101818548
p45863	rs3694833	86	10	105322454
p45022	rs3659212	86	10	111044242
p44776	rs3680872	87	10	117229465
p45124	rs3657221	88	10	121324596
p46119	rs3667606	88	10	127977424
p45167	rs3709299	88	10	130161470
p44873	rs3676616	88	10	130730543
p45346	rs3676330	88	10	131486953
p44531	rs3659787	89	11	4406638
p46051	rs3691311	89	11	7403321
p45189	rs3661631	89	11	9232453
p46154	rs3685735	89	11	11389163
p45738	rs3699329	89	11	11858106
p45190	rs3663826	89	11	12191194
p46294	rs3720722	89	11	15775067
p45932	rs3679497	89	11	17635273
p44781	rs3708339	90	11	21756037
p45655	rs4228613	90	11	22657942
p45355	rs3726603	90	11	24740875
p45279	rs3697361	90	11	25080188
p46017	rs3727156	90	11	25190000
p45611	rs3676510	90	11	27019881
p45935	rs3706539	90	11	27483326
p45931	rs3659581	90	11	29618305
p44778	rs3673465	91	11	35134851
p45141	rs3692365	91	11	39504757
p45864	rs3692893	91	11	41996967
p45191	rs3693664	91	11	41997145
p45654	rs3706883	91	11	43150732
p44533	rs3717281	91	11	45549429
p45612	rs3698063	92	11	53946929
p44783	rs4228731	92	11	55019870
p45933	rs3684076	92	11	56036051
p45192	rs3712695	92	11	57025442
p45278	rs3683066	92	11	58768981
p44910	rs3692116	92	11	59685097
p45280	rs3714311	92	11	63842645
p46413	rs3687024	92	11	66847750
p45489	rs3142904	92	11	70684158
p45140	rs3148189	92	11	70684211
p45351	rs3679340	93	11	74792835
p44747	rs3717361	93	11	82434805
p44676	rs3679687	93	11	82889996
p44908	rs3686569	93	11	83017457
p44641	rs3720112	93	11	87414951
p44657	mCV22974316	93	11	87604127
p45635	mCV22974300	93	11	87605212
p44520	mCV22974289	93	11	87607165
p45783	mCV22974275	93	11	87607360
p46211	rs3687072	94	11	88832965
p45350	rs3655280	94	11	89717118
p45798	rs3675440	94	11	92964177
p44674	rs3671548	94	11	94150066
p45934	rs3684399	94	11	95307795
p44983	rs3684436	94	11	95307817
p45514	rs3682334	94	11	97711901
p45353	rs3689184	94	11	100901702
p45586	rs3684024	95	11	101678836
p45142	rs3722158	95	11	104062496
p45352	rs3686516	95	11	105708276
p44561	rs3669823	95	11	107628258
p46053	rs3720981	95	11	108300767
p44907	rs3682143	96	11	112231902
p44780	rs3699056	96	11	113509302
p44631	rs3688691	96	11	116134689
p44782	rs3711884	97	11	116893196
p45587	rs4229215	97	11	119162792
p44633	rs3653990	98	12	5291083
p45364	rs4138084	98	12	6297851
p45517	rs3678128	98	12	7481572
p45659	rs3709002	98	12	9844529
p45588	rs3707458	98	12	10744512
p45144	rs3708624	98	12	10744662
p45363	rs3717933	98	12	11284617
p45362	rs3693390	98	12	12765808
p45464	rs3658504	98	12	16564761
p45143	rs3694821	98	12	16978929
p44635	rs3709287	99	12	19506842
p45495	rs3665857	99	12	21706823
p45009	rs3694816	99	12	24443815
p46430	rs3663018	99	12	24871966
p45776	rs3703980	99	12	25359583
p46346	rs3664753	99	12	26655082
p45656	rs3654802	99	12	27134343
p46266	rs3689251	100	12	29397958
p46225	rs3669704	100	12	31012849
p45126	rs3695382	100	12	31017543
p45194	rs3658204	100	12	31778569
p46054	rs3661834	100	12	33929808
p46227	rs3716646	100	12	37679728
p46219	rs3683481	100	12	38186373
p45358	rs3671194	100	12	39259790
p45937	rs3686437	100	12	39778322
p45356	rs3655309	100	12	46252565
p45802	rs3663333	100	12	47534403
p45196	rs3663603	100	12	48177922
p45282	rs3719306	101	12	53020135
p45198	rs3705833	101	12	53303966
p45034	rs3690129	101	12	55548506
p44853	rs3725347	101	12	60732011
p44677	rs3686891	101	12	61036166
p46265	rs3669929	101	12	61841577
p45032	rs3685346	101	12	61841751
p45036	rs3713923	102	12	64981848
p45359	rs3674090	102	12	68306697
p44911	rs3676335	102	12	69783131
p45125	rs3658768	102	12	70637025
p44588	rs3700554	102	12	72543537
p45039	rs3725854	102	12	77131331
p45035	rs3696951	102	12	78728690
p45038	rs3719282	103	12	83257045
p45307	rs3699539	103	12	84067743
p45435	rs3660579	103	12	87844491
p44785	rs3671316	103	12	87962865
p45306	rs3676085	103	12	88693507
p44587	rs3674235	103	12	95508942
p44786	rs4229529	103	12	97947875
p44632	rs3653844	104	12	103071663
p45801	rs3663172	104	12	103461248
p45657	rs3693074	104	12	107414075
p45040	rs3726183	104	12	108929929
p45614	rs3709829	104	12	110070420
p44570	rs4229612	104	12	108878229
p45199	rs3705923	104	12	113433354
p45361	rs3692361	104	12	113725861
p45202	rs3701757	105	13	16003584
p45366	rs3656715	105	13	18622942
p45662	rs3672666	105	13	21232280
p45369	rs3711424	106	13	31882133
p45438	rs4139503	106	13	31927028
p45664	rs3720707	106	13	32055962
p45523	rs3707097	106	13	34125011
p44789	rs3701164	106	13	39782061
p45436	rs3710418	106	13	41178865
p45806	rs3725354	106	13	41178888
p44679	rs3685941	107	13	44371350
p46228	rs3657836	107	13	46132740
p45805	rs3682400	107	13	47743001
p45043	rs3704459	107	13	52611824
p45201	rs3700944	108	13	57618237
p44912	rs3655227	108	13	62863542
p44748	rs3664376	108	13	65388480
p45909	rs3670719	108	13	66402642
p45941	rs4229849	108	13	64533808
p45146	rs3718727	108	13	66645668
p45200	rs3657699	108	13	67335802
p46019	rs3658685	108	13	69038779
p44790	rs3721965	109	13	71538903
p46160	rs3722699	109	13	73997502
p44854	rs3681284	109	13	74470501
p44915	rs3706924	109	13	75979791
p46414	rs3725009	109	13	76286291
p44914	rs3705446	109	13	78803772
p45309	rs3693027	110	13	83994917
p44536	rs3666540	110	13	85797433
p45465	rs3685298	110	13	87541767
p46159	rs3699802	110	13	88945282
p44562	rs3660479	110	13	91141830
p45739	rs3661467	110	13	94029813
p44680	rs3692326	110	13	96990528
p45522	rs3694204	110	13	97870148
p46231	rs3705003	111	13	102564276
p45145	rs3700495	111	13	105094668
p44788	rs3692862	111	13	105827891
p44681	rs3697753	111	13	107036094
p45163	rs3716813	111	13	107655591
p44683	rs4230100	112	13	112043762
p45365	rs3656262	112	13	115345132
p46157	rs3676640	112	13	116665913
p45437	rs4138442	112	13	116666263
p45888	rs3675054	112	13	118275930
p45891	rs3701693	113	14	6464841
p45995	rs3669812	113	14	8239573
p45371	rs3667005	113	14	10991934
p45524	rs3668908	113	14	10992273
p45889	rs3653743	113	14	12356966
p45741	rs3696385	113	14	12616729
p46350	rs3695372	114	14	17181976
p46059	rs3658866	114	14	17760054
p44918	rs3687985	114	14	20408133
p45048	rs3697334	114	14	21920338
p45590	rs3712886	114	14	21920591
p44685	rs3709612	114	14	24878105
p44917	rs3678167	114	14	25424306
p45809	rs3671357	115	14	37843669
p45996	rs3699072	115	14	39247197
p46296	rs3681670	115	14	43894746
p45807	rs3153444	115	14	45168515
p45207	rs3707560	115	14	45838733
p45439	rs3688833	115	14	45847534
p44590	rs3691821	115	14	49744979
p44591	rs3710549	115	14	52348507
p46384	rs3666026	115	14	53919597
p44919	rs3721918	115	14	56085375
p45208	rs3724660	115	14	60443512
p46385	rs3722536	115	14	63033268
p45892	rs3718611	115	14	65245284
p45665	rs3660202	116	14	70154863
p45046	rs3668114	116	14	78351965
p45867	rs3708535	116	14	78790620
p46349	rs3680448	116	14	79465720
p45760	rs3676913	116	14	80042495
p46161	rs3665858	116	14	83179776
p45525	rs4139735	116	14	84977006
p46104	rs3704676	116	14	89284861
p46351	rs3705873	116	14	89911266
p44916	rs3670872	116	14	92415715
p46105	rs3717612	116	14	93095634
p45808	rs3663423	116	14	94090336
p46058	rs3654132	116	14	99123272
p45866	rs3678059	116	14	99253803
p45372	rs3691899	116	14	99332443
p45203	rs3654691	117	14	109987850
p44589	rs3656556	117	14	111712633
p45045	rs3665550	117	14	112135550
p45740	rs3682013	117	14	113782738
p46297	rs3682065	117	14	113782763
p45050	rs4230610	117	14	114392144
p45467	rs3714594	117	14	114491783
p45378	rs3707453	118	15	6436400
p45441	rs3665826	118	15	6443556
p45999	rs3715491	118	15	5804557
p45440	rs3661608	118	15	98647174
p45375	rs3696823	118	15	19306420
p45376	rs3697155	118	15	23173163
p46162	rs3702361	118	15	29641381
p44732	rs3666257	119	15	32830679
p45671	rs3668136	119	15	32831022
p45052	rs3714995	119	15	40323904
p45210	rs3724697	119	15	6502440
p45998	rs3677296	119	15	6497620
p45329	rs3716703	119	15	42937388
p44750	rs3716768	119	15	42937423
p45762	rs3684635	119	15	52678193
p45616	rs3707900	119	15	53591096
p44691	rs3702158	120	15	58943787
p44686	rs3653368	120	15	59937997
p45127	rs3668786	120	15	62349723
p45617	rs3727135	120	15	89067113
p44595	rs4137555	120	15	66667520
p45377	rs3706861	120	15	67302800
p46064	rs3708614	120	15	69462081
p46369	rs4230805	120	15	71704754
p45526	rs3696862	120	15	72652983
p44794	rs3655952	120	15	74402689
p44688	rs3682805	121	15	79535516
p44593	rs3667621	121	15	80457686
p44592	rs3665585	121	15	83913302
p44689	rs3683112	121	15	87410042
p44693	rs4230930	121	15	87576553
p44994	rs3657139	121	15	13185133
p44690	rs3694472	121	15	89700806
p44995	rs3667785	122	15	95387207
p45670	rs3667754	122	15	96108190
p45285	rs3719217	122	15	97253349
p45814	rs4137928	122	15	99120210
p45672	rs3724301	122	15	101013404
p44795	rs3690173	122	15	102971161
p44636	rs4231033	122	15	21717768
p45947	rs3715939	123	16	5457456
p45443	rs3722676	123	16	6816272
p45592	rs4151923	123	16	13376351
p44597	rs3673183	123	16	14051913
p44797	rs3714738	123	16	14260417
p44855	rs4165301	124	16	22437843
p45218	rs4165379	124	16	23356807
p44799	rs4165446	124	16	23967238
p45591	rs3682563	124	16	27259772
p45944	rs3669767	124	16	27403239
p45673	rs3658872	124	16	31410563
p44695	rs3676973	124	16	32137649
p45945	rs3682565	124	16	33952435
p45529	rs3713911	124	16	35293698
p44599	rs4151928	124	16	38153087
p45816	rs3663871	125	16	41598339
p45054	rs3713966	125	16	44278213
p46302	rs3723465	125	16	45164267
p45053	rs3682852	125	16	47603941
p45286	rs3705921	125	16	49437647
p44924	rs3690619	125	16	49749800
p44926	rs4135604	125	16	50100799
p45948	rs3719157	126	16	51423297
p46067	rs3688027	126	16	53189403
p44925	rs3702995	126	16	54495023
p45870	rs3687272	126	16	55093657
p44923	rs3682166	126	16	57870212
p45819	rs3717690	126	16	60213797
p44796	rs3687551	126	16	64255840
p46106	rs3675347	126	16	64453651
p45213	rs3693190	126	16	66044270
p45380	rs3695481	127	16	68778145
p45212	rs3668777	127	16	71265509
p44598	rs3721202	127	16	73896357
p45817	rs3702474	127	16	75398644
p45444	rs4135423	127	16	75544468
p45818	rs3704648	127	16	76022498
p44922	rs3680665	128	16	85801548
p45214	rs3693968	128	16	86550297
p45217	rs3724196	128	16	87208355
p45743	rs3709512	128	16	87794511
p44694	rs3674782	128	16	88678302
p44539	rs3655083	128	16	92448866
p45528	rs3690561	128	16	93072498
p46000	rs3664190	128	16	94869256
p44493	rs3148818	128	16	95518659
p45530	rs3722843	128	16	99618726
p44496	rs4137196	129	17	3958349
p45222	rs3722983	129	17	8495204
p46451	rs3669518	129	17	9807440
p45324	rs3671396	129	17	9807762
p44601	rs3716460	129	17	9811953
p44696	rs3667406	129	17	11227288
p46303	rs3664841	129	17	15853603
p44543	rs3667748	129	17	16296128
p45893	rs3721884	129	17	17064184
p45821	rs3667809	130	17	20114540
p45487	rs3696528	130	17	20600182
p44997	rs3667411	130	17	23990783
p44602	rs4231406	130	17	27212748
p45618	rs3723968	130	17	28438186
p46121	rs3704177	130	17	29741204
p45497	rs3725973	130	17	30020884
p45498	rs3726411	130	17	30020900
p44752	rs3724223	131	17	33208059
p45006	rs3702309	131	17	35903194
p44642	rs4139933	131	17	35903400
p44767	rs3675818	131	17	44643137
p44541	rs3658769	131	17	45093891
p44928	rs3705130	131	17	48208971
p45287	rs4137228	131	17	48209030
p45148	rs3682797	131	17	49778354
p46069	rs3661796	131	17	52302948
p45593	rs3667909	131	17	55028340
p45057	rs3709414	131	17	55605730
p44929	rs3707749	131	17	63187220
p44495	rs3684212	132	17	67340078
p44801	rs3666819	132	17	68372448
p45531	rs3657117	132	17	69443194
p46166	rs3680857	132	17	72744846
p45594	rs3706023	132	17	73471264
p44751	rs3697418	132	17	74253427
p45219	rs3710559	132	17	75855400
p46070	rs3694520	132	17	76511175
p45679	rs4136073	132	17	77554080
p44600	rs3670607	132	17	80078504
p45166	rs3676756	132	17	81673592
p45532	rs3686767	132	17	82084034
p45056	rs3706971	133	17	84524129
p46001	rs3717026	133	17	88511109
p44697	rs3670275	133	17	89310531
p45221	rs3720344	133	17	90863272
p46439	rs3706748	133	17	92591826
p45445	rs3716639	133	17	94241256
p45822	rs3707114	133	17	95125844
p45950	rs3681154	134	18	5857830
p44856	rs3662231	134	18	6096251
p46073	rs3680668	134	18	7496146
p45223	rs3670421	134	18	9394158
p45744	rs3660245	134	18	9538908
p44544	rs3723041	134	18	9817309
p45823	rs3710602	134	18	12027177
p45446	rs3664343	134	18	12151714
p45535	rs3682653	134	18	13558175
p46404	rs3683013	135	18	27023319
p45059	rs3671174	135	18	28712773
p46168	rs3664831	136	18	37411461
p45953	rs3717447	136	18	38482000
p46280	rs3668427	136	18	42246783
p45227	rs3711076	136	18	43072858
p45534	rs3680212	136	18	43882936
p46354	rs3658489	136	18	45295567
p45682	rs3707785	136	18	48978822
p45288	rs3703039	136	18	49549708
p45150	rs3677195	136	18	51963001
p45825	rs3726356	136	18	52595571
p45228	rs4231860	136	18	53958846
p45951	rs3683378	136	18	56063412
p46432	rs3684312	136	18	11537207
p44698	rs3705107	136	18	57454700
p45781	rs3675255	137	18	63166543
p45448	rs3720135	137	18	63166532
p46390	rs3724035	137	18	63860091
p44805	rs3661189	137	18	66298292
p45165	rs3678691	137	18	68501426
p44998	rs3658163	137	18	69015480
p45386	rs3684593	137	18	71007128
p44753	rs3655324	137	18	72602451
p46037	rs3723567	137	18	73912567
p44804	rs3656890	137	18	75591153
p45949	rs3655977	138	18	85673762
p44875	rs4232034	139	19	4190361
p46212	rs3690148	139	19	4205606
p44483	rs3665056	139	19	4509634
p44700	rs3713033	139	19	4850975
p44478	rs4232023	139	19	5460975
p46241	rs3673807	140	19	11775675
p45063	rs4137097	140	19	14096702
p44644	rs3661656	140	19	14410086
p44643	rs3659857	140	19	14570183
p45061	rs3658667	141	19	6453622
p45230	rs3672759	141	19	22568733
p45231	rs3688671	141	19	23869234
p45449	rs3653771	141	19	2548924
p44932	rs3723852	141	19	2554891
p45312	rs3664564	141	19	24641386
p45956	rs3704503	141	19	30058262
p44999	rs3686450	141	19	31879184
p45871	rs4232151	141	19	32474691
p44604	rs3705022	142	19	36468043
p46074	rs3653886	142	19	37775177
p45826	rs3697994	142	19	10921271
p46355	rs3697139	142	19	40205407
p46124	rs3677115	142	19	40774645
p46123	rs3656289	142	19	42634335
p45229	rs3658160	143	19	47019084
p45500	mCV22979960	143	19	51287262
p44890	mCV22979964	143	19	51287427
p44892	mCV23068522	143	19	52192958
p45916	mCV23069037	143	19	52161574
p45915	mCV22608007	143	19	52393324
p44811	rs3722335	143	19	52856114
p44808	rs3708392	144	19	55518703
p44699	rs3663566	144	19	56715082
p45289	rs4232268	145	19	60179043
p44545	rs3653668	145	19	60268103
p45537	rs3726433	145	19	60647827
p44857	rs3694467	145	19	60650035
p45062	rs3692709	145	19	60940417
