# Supplementary material for: Integrative Analysis Using Module-Guided Random Forests Reveals Correlated Genetic Factors Related to Mouse Weight
Source: PLoS Comput Biol. 2013 Mar 7;9(3):e1002956. doi: 10.1371/journal.pcbi.1002956 (PMC3591263; doi:10.1371/journal.pcbi.1002956)
Supplement: Table S8 — List of 100 top-ranked genes identified by Group lasso, Elastic net, SVR-RFE, and conventional RF. (XLSX) [file pcbi.1002956.s013.xlsx]

## Sheet: Table S4
Table S8. List of 100 top-ranked genes identified by Group lasso, Elastic net, SVR-RFE, and conventional RF
Group Lasso			Elastic Net			SVR-RFE			Conventional RF
RowID	Symbol	Score	RowID	Symbol	Score	RowID	Symbol	Score	RowID	Symbol	Score
3733	Gsta2	1.6448	1783	2010109K11Rik	12.021	3764	Fmo3	1578.2	5100	Igfbp2	18.4261
3763	Fmo3	1.0107	4071	Sostdc1	9.075	5101	Igfbp2	1123.24	3987	9430028I06Rik	5.6203
1141	Slc2a4	0.98998	6869	Sytl1	6.8316	4213	Mogat1	1009.65	4212	Mogat1	5.42923
5840	Tmc5	0.96413	3689	2700045P11Rik	6.3071	3581	Dct	1004.15	3763	Fmo3	4.92125
1044	Cyp2c44	0.87196	5320	C630004H02Rik	6.2242	1407	Ifi202b	872.428	6890	Zar1	3.7309
1869	Sqle	0.86583	6890	Zar1	6.2059	4741	AW011956	722.117	982	Bucs1	3.50502
2622	Cfhl1	0.85171	5100	Igfbp2	5.442	2494	Marco	587.601	4120	Slc43a1	3.12428
5894	Plekhb1	0.82573	3141	6430514L14Rik	5.3017	5882	Hsd17b13	586.489	2632	Serpinf2	2.68683
2246	Ngp	0.78349	1535	Mppe1	4.948	5668	Mpa2	575.887	5870	Pdia5	2.6645
3580	Dct	0.75089	3888	Zfp275	4.8669	3988	9430028I06Rik	541.69	5309	Angpt2	1.76817
735	Adamdec1	0.65449	5214	Smyd2	4.8125	6863	V2r8	529.66	3525	Grem2	1.55832
1052	Myf6	0.61596	473	2310012P17Rik	4.5475	7055	Zfp263	500.697	2359	Slc25a5	1.00987
3728	Slc23a1	0.61276	5282	3732412D22Rik	4.4483	6820	Vmn2r104	492.201	5282	3732412D22Rik	0.982853
545	Bank1	0.55559	5630	Ctag3	4.3726	6438	U2af1	479.703	377	Avpr1a	0.970806
3788	Gpnmb	0.50537	332	Gip	4.1699	4591	Dnaic1	472.928	3735	Hey2	0.848942
5881	Hsd17b13	0.4975	906	2310032D16Rik	4.1074	1045	Cyp2c44	462.388	2204	Lancl1	0.836619
5709		0.48768	2631	Acox2	3.7004	6521	Slc15a2	459.833	904	BC029214	0.787664
3263	Sult1e1	0.48495	3987	9430028I06Rik	3.5421	3810	Aqr	430.338	3888	Zfp275	0.750152
547	4930511O11Rik	0.47948	5065	Akap10	3.1954	5199	Fabp5	415.749	5119	3110006E14Rik	0.723925
906	2310032D16Rik	0.47797	1768		3.0614	4002	Cyp3a41	402.425	7006	9330175B01Rik	0.723741
2791	Sult3a1	0.44842	4292	Aarsl	3.0403	1253	Cyp3a13	394.158	4615	Mrpl44	0.704266
2615	Emilin2	0.44749	1249	Egln1	2.9432	2379	Mpa2	383.906	3886	1700009P13Rik	0.699823
2034	Sult2a1	0.43482	1504	Tex19	2.9358	6468	Fabp5	354.747	2630	Actg1	0.671625
7257	LOC381484	0.43248	6128	Olfr494	2.8912	5003	C4	318.801	632	Gpr110	0.668098
3765	Klra18	0.40663	3893	Olfr1188	2.8518	750	BC014805	314.753	5427	Pdk4	0.667978
2629	Cd163	0.39793	2967	Rfwd2	2.7654	5902	Pex2	305.617	1781	Gprk5	0.661381
739	Pgam1	0.39203	3945	Mkrn1-ps1	2.592	3264	Sult1e1	295.879	1433	Pbp	0.660284
1142	Apcs	0.38127	377	Avpr1a	2.4367	732	Cyp3a41	290.753	5627	Ftl1	0.640266
3736	Tgtp	0.37555	3806	Hbb-y	2.3792	378	Avpr1a	279.86	4590	Dnaic1	0.62551
533	A1bg	0.37317	1843	Chat	2.3686	1497	S3-12	279.413	5416	1300010F03Rik	0.618164
3642	Arhgef10	0.36882	7274	Wibg	2.3064	5044	A930016D02Rik	267.224	1738	4833409A17Rik	0.609118
681	Car1	0.36606	6959	Tex15	2.2437	1344	C330011K17Rik	260.25	1047	Arpc2	0.604832
3729	5730496F10Rik	0.36557	3192	Odc1	2.1807	5120	3110006E14Rik	259.795	657	Edg7	0.595166
2417	EG633640	0.36298	4818		2.1184	2401	Igfbp1	256.691	3909	Synpo	0.593886
7254	BC048546	0.36275	4125	Lcn9	2.0725	6342	Irg1	250.956	2707	Stk39	0.591231
524	Igf2	0.35319	3562	Fbxl7	2.0679	3929	4930522H14Rik	249.838	134	Mest	0.584862
542		0.34962	4953	Mras	1.9916	6990	Grpr	246.053	1783	2010109K11Rik	0.584204
2618	Taf1c	0.34807	6907	4632411B12Rik	1.9153	585		243.285	3242	Depdc6	0.580336
6069	Atp6v1c2	0.34748	6641	Uck1	1.9136	1835	Dio1	241.567	6641	Uck1	0.578728
4226	Pbx4	0.34706	1789	Samsn1	1.9101	5526	H28	239.904	3884	Isg20	0.577843
718	Csf2rb2	0.34015	3636		1.8881	857	1600032L17Rik	234.95	4863	Dp1	0.563763
5592	LOC236604///4933439C20Rik	0.33655	285	Rhpn2	1.8675	5838	Pttg1	233.805	3649	Mesp1	0.560677
2024	Amn	0.335	558	Rab6b	1.8666	1492	Cbfa2t3h	232.583	816	AI316787	0.560066
513	5033428B15Rik	0.3329	6606	BC042569	1.6703	7170	Rab3c	220.102	1150	D13Wsu64e	0.54832
3773	Gucy1b3	0.33189	3580	Dct	1.4609	3844	Scap2	220.036	3722	Spag1	0.543849
854	Ly6d	0.33128	5663	St3gal4	1.4338	6960	Tex15	218.688	3269		0.521706
2400	Igfbp1	0.33059	2458	Cd200	1.4116	5323	Il22ra2	214.256	5081	Pex11a	0.518289
1086	Trf	0.3213	4854	5730494M16Rik	1.3766	5326	Lect1	212.846	1840	2610300B10Rik	0.501739
912	Dntt	0.3181	6865	Hspb2	1.3433	4304	Socs2	211.141	1560	Pign	0.49952
550	4933440J22Rik	0.3176	1409	Gnpda2	1.3139	6177	Cyp17a1	210.829	2068	2700085M18Rik	0.487997
3238		0.31395	5309	Angpt2	1.3137	4653	D10Bwg0791e	206.088	2493	Marco	0.483336
3775		0.3123	4527	Cd209d	1.2287	559	Rab6b	203.829	3836	Utp14b	0.47737
538	Leng8	0.3116	2451	Nalp10	1.1034	4340	9230106L14Rik	198.344	3007	1700108F19Rik	0.474536
7330	Tuba1c	0.30059	6481	Olfr633	1.0998	7130	Olfr617	198.034	4835	Prdx1	0.470541
683	BC028265	0.29964	550	4933440J22Rik	1.0904	2768	Hbegf	197.364	2647	Cib2	0.46589
3774	Stxbp6	0.29759	1720	5430437J10Rik	1.0696	5268	Sult3a1	195.482	4008	Scarb1	0.465246
5525	H28	0.29563	1451	Thsd6	1.0517	5082	Pex11a	194.213	6811	4930513F16Rik	0.462009
1140	Pcdha4	0.29465	983	Olfr29-ps1	1.0503	7148	Kif27	188.581	6995	Prhoxnb	0.456607
3755		0.29276	5843	Prr7	1.05	494	Gas7	187.567	1044	Cyp2c44	0.454906
3747	Tnip2	0.29164	2235	2010110P09Rik	1.0318	1037	Corin	186.302	3436	Atp10d	0.451445
2493	Marco	0.28748	3811	Irak4	1.0141	907	2310032D16Rik	186.145	827	Pkm2	0.443305
2802	Chchd6	0.28077	885		1.0105	478	Camp	184.076	1036	Corin	0.440205
2265	5330426P16Rik	0.27939	6414	Thea	1.0069	6751	Slc12a1	182.385	3489	Srd5a2	0.435921
495	Fcer1a	0.27882	3816	1700020D05Rik	0.98833	5310	Angpt2	180.82	5667	Mpa2	0.43581
3537	Zfp46	0.2774	2373	Slc4a1	0.9849	4803	Igh-VJ558	176.535	2862		0.423917
7256	Mass1	0.27548	6579	Nrxn3	0.97903	422	Cyp2c40	176.354	6290		0.421376
3739	Slc24a3	0.27263	5869	Grm1	0.88534	4335	Chi3l3	176.344	1471	3110009E18Rik	0.419948
3525	Grem2	0.26448	405	Ssbp2	0.87689	801	Sdfr1	175.602	1919		0.416534
536	Usp39	0.26319	4932	Dctd	0.81786	7396	#N/A	174.647	1891	Pi4k2b	0.415031
1070	2200001I15Rik	0.26295	2784	Stk16	0.77617	1612	Thrsp	174.379	1175	Foxd3	0.407765
1788	V2r2	0.2615	4298		0.75479	3643	Arhgef10	173.973	881	Mcart1	0.402368
5888	Atp6v1e2	0.2609	7129	Olfr617	0.74025	2301	Socs2	171.743	826	D830019K17Rik	0.398605
715	Tmod4	0.25963	7336		0.72373	6580	Nrxn3	170.669	2042	5430413K10Rik	0.396685
494	Rbp1	0.25947	4540	Oasl1	0.69285	5841	Tmc5	169.882	3636		0.395909
510	Ppia	0.25653	5275	Olfr713	0.654	1637	Gstm2	169.108	4978	Supt16h	0.393253
1121	Nr3c1	0.25265	5370	C130038G02Rik	0.61803	1345	Phactr1	164.572	79		0.387506
710	Tcf1	0.25216	535	Hlf	0.60695	6812	4930513F16Rik	162.538	5104	1700011H14Rik	0.38516
1857	Serpini2	0.25087	7291	Aggf1	0.59721	3947	1810014B01Rik	160.885	7078		0.381157
1870	Cald1	0.25055	115	Prnp	0.58897	6891	Zar1	160.327	4318	Adcy8	0.380972
3746	Mcpt1	0.2468	5097	Fgfr2	0.57625	5170	Olfr114	160.21	669	Ctsd	0.37976
1036	Corin	0.24121	856	1600032L17Rik	0.56517	6416	Cyp2c55	159.448	6141	Fabp2	0.379726
3779	Zbtb33	0.24045	3674	Laf4	0.52871	2025	Amn	157.456	5112	D19Ertd737e	0.375622
743	Gpr73	0.23961	4339	9230106L14Rik	0.51014	2863		157.014	2724	Bcmo1	0.37088
509	Tnfsf10	0.23882	6693	Pard3	0.50815	7150	AA589608	156.247	464	Slc25a5	0.365583
3766	Prap1	0.2361	1044	Cyp2c44	0.50694	7021	Olfr419	155.588	6667	Ang1	0.360561
3761	Bcdo2	0.23536	1218	Plxnb1	0.48767	5630	Egr2	154.832	4315	Abca8a	0.357702
505	Srpx2	0.23396	826	D830019K17Rik	0.48402	5371	C130038G02Rik	153.776	3058	A530032D15Rik	0.354233
720	Vsig4	0.23127	3214	Olfr402	0.45419	5065	Fbxo21	152.237	3503	Ccl27	0.353925
5892	AU022084	0.23073	795	Pqlc2	0.4351	827	D830019K17Rik	151.563	5666	2610002D18Rik	0.353925
4868	Olfr791	0.22851	4416	Trib3	0.42581	7161	Olfr575	151.479	5242	Sfrs2	0.351531
3260	4930420O11Rik	0.22794	5700	Gp5	0.38416	280	Cxcl7	148.613	2268	Pip5k1c	0.34499
724	Bnip3	0.22332	6862	V2r8	0.38058	736	Adamdec1	146.54	6666	Olfr701	0.339586
2767	Hbegf	0.22194	3956	6720456H20Rik	0.37881	532	Tcte1	146.291	4720	Asah2	0.336401
2263	Fer1l4	0.2215	5949	Slc7a7	0.28323	5277	Hmox1	142.638	4793	1110060M21Rik	0.333724
2619	Hand1	0.22021	3300	Es1	0.2695	3710	Tcfcp2l3	142.028	4461	Rnpc1	0.328367
1116		0.22016	2818	Ddc	0.24918	905	BC029214	139.746	5281	Ybx1	0.327785
705	Hmgb1	0.21927	4749		0.23108	6667	Olfr701	139.176	2207	Nostrin	0.327254
731	Cyp3a41	0.21879	1980	Esm1	0.20647	2247	Ngp	138.855	4812		0.316258
516		0.21635	7147	Kif27	0.19071	1354	Synpo2	138.597	1755	Dgkq	0.31621
1124	Thbs2	0.2162	397	4930548H24Rik	0.18473	147	A330049M08Rik	136.12	4436	Arfl4	0.300228
