# Supplementary material for: Integrative Analysis Using Module-Guided Random Forests Reveals Correlated Genetic Factors Related to Mouse Weight
Source: PLoS Comput Biol. 2013 Mar 7;9(3):e1002956. doi: 10.1371/journal.pcbi.1002956 (PMC3591263; doi:10.1371/journal.pcbi.1002956)
Supplement: Table S9 — Gene Ontology enrichment analysis of top-ranked genes (p-value<0.01) identified by mgRF, group lasso, elastic net, SVR-RFE, and conventional RF. (XLSX) [file pcbi.1002956.s014.xlsx]

## Sheet: mgRF
Table S9. Enriched Biological Process (GO) in top-100 ranked genes idetified by mgRF, group lasso, elastic net, SVR-RFE, and conventional RF
mgRF
GO ID	Term Name	GO Level	Num	List Total	Expected Num	Pop Total	Genes	p-val
GO:0010883	regulation of lipid storage	4	4	59	10	4164	Scarb1,Msr1,Mest,Cd36	7.16894e-06
GO:0010886	positive regulation of cholesterol storage	5	3	59	4	4164	Scarb1,Msr1,Cd36	1.07051e-05
GO:0010885	regulation of cholesterol storage	5	3	59	5	4164	Scarb1,Msr1,Cd36	2.64927e-05
GO:0010884	positive regulation of lipid storage	4	3	59	6	4164	Scarb1,Msr1,Cd36	5.24511e-05
GO:0034381	plasma lipoprotein particle clearance	3	3	59	7	4164	Scarb1,Msr1,Cd36	9.08642e-05
GO:0034383	low-density lipoprotein particle clearance	4	2	59	2	4164	Scarb1,Cd36	0.000197407
GO:0040008	regulation of growth	3	9	59	171	4164	Igfbp2,Avpr1a,Esm1,Creg1,Inhba,Htra4,Mbl1,Socs2,Cd36	0.000574563
GO:0015918	sterol transport	5	3	59	14	4164	Scarb1,Msr1,Cd36	0.000880425
GO:0030301	cholesterol transport	6	3	59	14	4164	Scarb1,Msr1,Cd36	0.000880425
GO:0010744	positive regulation of macrophage derived foam cell differentiation	6	2	59	4	4164	Msr1,Cd36	0.00116292
GO:0006910	phagocytosis, recognition	3	2	59	5	4164	Scarb1,Cd36	0.00192054
GO:0015850	organic hydroxy compound transport	4	3	59	20	4164	Scarb1,Msr1,Cd36	0.00259561
GO:0010743	regulation of macrophage derived foam cell differentiation	5	2	59	6	4164	Msr1,Cd36	0.00285459
GO:0048514	blood vessel morphogenesis	3	3	59	22	4164	Angpt2,Dll4,Serpinf2	0.00343655
GO:0071397	cellular response to cholesterol	7	2	59	7	4164	Gpld1,Inhba	0.00396008
GO:0036315	cellular response to sterol	6	2	59	7	4164	Gpld1,Inhba	0.00396008
GO:0042953	lipoprotein transport	4	2	59	7	4164	Msr1,Cd36	0.00396008
GO:0006869	lipid transport	4	4	59	52	4164	Inhba,Scarb1,Msr1,Cd36	0.00593189
GO:0055114	oxidation-reduction process	3	9	59	240	4164	Cyp2c37,Fmo3,Pdia5,Creg1,Cyp2c54,5730469M10Rik,Cd36,Gys2,Cyp2c50	0.00602356
GO:0045646	regulation of erythrocyte differentiation	4	2	59	9	4164	Inhba,Lmo2	0.00666597
GO:0003044	regulation of systemic arterial blood pressure mediated by a chemical signal	5	2	59	9	4164	Avpr1a,Serpinf2	0.00666597
GO:0044130	negative regulation of growth of symbiont in host	5	2	59	9	4164	Mbl1,Cd36	0.00666597
GO:0043537	negative regulation of blood vessel endothelial cell migration	8	2	59	9	4164	Angpt2,Dll4	0.00666597
GO:0050886	endocrine process	4	2	59	9	4164	Avpr1a,Serpinf2	0.00666597
GO:0001990	regulation of systemic arterial blood pressure by hormone	5	2	59	9	4164	Avpr1a,Serpinf2	0.00666597
GO:0044146	negative regulation of growth of symbiont involved in interaction with host	5	2	59	9	4164	Mbl1,Cd36	0.00666597
GO:0044144	modulation of growth of symbiont involved in interaction with host	4	2	59	9	4164	Mbl1,Cd36	0.00666597
GO:0044126	regulation of growth of symbiont in host	4	2	59	9	4164	Mbl1,Cd36	0.00666597
GO:0071396	cellular response to lipid	5	4	59	56	4164	Gpld1,Inhba,Scarb1,Cd36	0.00771721
GO:0043534	blood vessel endothelial cell migration	5	2	59	10	4164	Gpld1,Scarb1	0.00825691
GO:0001558	regulation of cell growth	4	5	59	90	4164	Igfbp2,Avpr1a,Esm1,Inhba,Htra4	0.00843008
GO:0010594	regulation of endothelial cell migration	6	3	59	31	4164	Gpld1,Angpt2,Dll4	0.00916532
GO:0050820	positive regulation of coagulation	5	2	59	11	4164	Serpinf2,Cd36	0.0100004
GO:0003073	regulation of systemic arterial blood pressure	4	2	59	11	4164	Avpr1a,Serpinf2	0.0100004
GO:0050766	positive regulation of phagocytosis	6	2	59	11	4164	Mbl1,Cd36	0.0100004
GO:1900048	positive regulation of hemostasis	5	2	59	11	4164	Serpinf2,Cd36	0.0100004
GO:0030194	positive regulation of blood coagulation	6	2	59	11	4164	Serpinf2,Cd36	0.0100004
Group lasso
GO ID	Term Name	GO Level	Num	List Total	Expected Num	Pop Total	Genes	p-val
GO:0051923	sulfation	4	2	68	4	4164	Sult1e1,Sult2a1	0.0015438
GO:0015992	proton transport	4	3	68	22	4164	Slc2a4,Atp6v1c2,Atp6v1e2	0.00513717
GO:0006818	hydrogen transport	3	3	68	22	4164	Slc2a4,Atp6v1c2,Atp6v1e2	0.00513717
GO:0046885	regulation of hormone biosynthetic process	5	2	68	7	4164	Igf2,Nr3c1	0.00523433
GO:0007006	mitochondrial membrane organization	5	2	68	7	4164	Chchd6,Bnip3	0.00523433
GO:0090030	regulation of steroid hormone biosynthetic process	6	2	68	7	4164	Igf2,Nr3c1	0.00523433
GO:0010906	regulation of glucose metabolic process	6	4	68	45	4164	Pgam1,Igf2,Nr3c1,Hmgb1	0.00585883
GO:0007565	female pregnancy	3	2	68	8	4164	Sult1e1,Corin	0.00690575
GO:0010675	regulation of cellular carbohydrate metabolic process	5	4	68	48	4164	Pgam1,Igf2,Nr3c1,Hmgb1	0.00737644
GO:0006109	regulation of carbohydrate metabolic process	5	4	68	50	4164	Pgam1,Igf2,Nr3c1,Hmgb1	0.00852039
GO:0015991	ATP hydrolysis coupled proton transport	5	2	68	9	4164	Atp6v1c2,Atp6v1e2	0.00878562
GO:0032350	regulation of hormone metabolic process	4	2	68	9	4164	Igf2,Nr3c1	0.00878562
GO:0015988	energy coupled proton transmembrane transport, against electrochemical gradient	4	2	68	9	4164	Atp6v1c2,Atp6v1e2	0.00878562
Elastic net
GO ID	Term Name	GO Level	Num	List Total	Expected Num	Pop Total	Genes	p-val
GO:0021873	forebrain neuroblast division	6	2	62	2	4164	Dct,Fgfr2	0.000218175
GO:0021847	ventricular zone neuroblast division	4	2	62	2	4164	Dct,Fgfr2	0.000218175
GO:0055057	neuroblast division	5	2	62	2	4164	Dct,Fgfr2	0.000218175
GO:0070884	regulation of calcineurin-NFAT signaling cascade	6	2	62	3	4164	2010110P09Rik,Prnp	0.000648234
GO:0021869	forebrain ventricular zone progenitor cell division	3	2	62	4	4164	Dct,Fgfr2	0.00128402
GO:0048103	somatic stem cell division	4	2	62	5	4164	Dct,Fgfr2	0.00211951
GO:0046006	regulation of activated T cell proliferation	8	2	62	9	4164	Igfbp2,Prnp	0.00734244
GO:0042304	regulation of fatty acid biosynthetic process	6	2	62	9	4164	Avpr1a,Trib3	0.00734244
GO:0017145	stem cell division	3	2	62	10	4164	Dct,Fgfr2	0.00909048
SVR-RFE
GO ID	Term Name	GO Level	Num	List Total	Expected Num	Pop Total	Genes	p-val
GO:0007588	excretion	4	2	65	2	4164	Slc12a1,Amn	0.000239981
GO:0044706	multi-multicellular organism process	2	3	65	12	4164	Sult1e1,Avpr1a,Corin	0.000722457
GO:0060396	growth hormone receptor signaling pathway	7	2	65	4	4164	Socs2,Socs2	0.00141099
GO:0071378	cellular response to growth hormone stimulus	6	2	65	4	4164	Socs2,Socs2	0.00141099
GO:0003351	epithelial cilium movement	5	2	65	4	4164	Dnaic1,Kif27	0.00141099
GO:0046890	regulation of lipid biosynthetic process	5	4	65	35	4164	Pex2,Avpr1a,Cyp17a1,Thrsp	0.00196919
GO:0060749	mammary gland alveolus development	3	2	65	5	4164	Socs2,Socs2	0.00232796
GO:0060416	response to growth hormone stimulus	5	2	65	5	4164	Socs2,Socs2	0.00232796
GO:0043627	response to estrogen stimulus	5	3	65	19	4164	Socs2,Socs2,Hmox1	0.00294297
GO:0040015	negative regulation of multicellular organism growth	5	2	65	6	4164	Socs2,Socs2	0.00345682
GO:0007031	peroxisome organization	4	2	65	6	4164	Pex2,Pex11a	0.00345682
GO:0003341	cilium movement	4	2	65	6	4164	Dnaic1,Kif27	0.00345682
GO:0046426	negative regulation of JAK-STAT cascade	7	2	65	6	4164	Socs2,Socs2	0.00345682
GO:0055114	oxidation-reduction process	3	10	65	240	4164	Fmo3,Hsd17b13,Cyp2c44,Cyp3a13,Pex2,Dio1,Cyp17a1,Cyp2c40,Cyp2c55,Hmox1	0.00361881
GO:0046425	regulation of JAK-STAT cascade	6	3	65	21	4164	Il22ra2,Socs2,Socs2	0.00395045
GO:0040008	regulation of growth	3	8	65	171	4164	Igfbp2,Avpr1a,Igfbp1,Pttg1,Socs2,Hbegf,Camp,Socs2	0.00468515
GO:0007595	lactation	4	2	65	7	4164	Socs2,Socs2	0.00479093
GO:0032355	response to estradiol stimulus	5	2	65	8	4164	Socs2,Socs2	0.0063238
GO:0007565	female pregnancy	3	2	65	8	4164	Sult1e1,Corin	0.0063238
GO:0003044	regulation of systemic arterial blood pressure mediated by a chemical signal	5	2	65	9	4164	Avpr1a,Corin	0.00804909
GO:0006656	phosphatidylcholine biosynthetic process	5	2	65	9	4164	Fabp5,Fabp5	0.00804909
GO:0050886	endocrine process	4	2	65	9	4164	Avpr1a,Corin	0.00804909
GO:0001990	regulation of systemic arterial blood pressure by hormone	5	2	65	9	4164	Avpr1a,Corin	0.00804909
GO:0045017	glycerolipid biosynthetic process	4	3	65	29	4164	Mogat1,Fabp5,Fabp5	0.00993151
GO:0035176	social behavior	3	2	65	10	4164	Avpr1a,Grpr	0.00996062
GO:0035813	regulation of renal sodium excretion	5	2	65	10	4164	Avpr1a,Corin	0.00996062
GO:0007589	body fluid secretion	4	2	65	10	4164	Socs2,Socs2	0.00996062
Conventional RF
GO ID	Term Name	GO Level	Num	List Total	Expected Num	Pop Total	Genes	p-val
GO:0003044	regulation of systemic arterial blood pressure mediated by a chemical signal	5	3	56	9	4164	Serpinf2,Avpr1a,Corin	0.000182819
GO:0050886	endocrine process	4	3	56	9	4164	Serpinf2,Avpr1a,Corin	0.000182819
GO:0001990	regulation of systemic arterial blood pressure by hormone	5	3	56	9	4164	Serpinf2,Avpr1a,Corin	0.000182819
GO:0003073	regulation of systemic arterial blood pressure	4	3	56	11	4164	Serpinf2,Avpr1a,Corin	0.0003523
GO:0006702	androgen biosynthetic process	4	2	56	4	4164	Scarb1,Srd5a2	0.00104771
GO:0045446	endothelial cell differentiation	5	2	56	5	4164	Hey2,Mesp1	0.00173111
GO:0010460	positive regulation of heart rate	4	2	56	5	4164	Avpr1a,Hey2	0.00173111
GO:0008209	androgen metabolic process	4	2	56	6	4164	Scarb1,Srd5a2	0.00257427
GO:0045823	positive regulation of heart contraction	5	2	56	6	4164	Avpr1a,Hey2	0.00257427
GO:0019933	cAMP-mediated signaling	7	2	56	6	4164	Adcy8,Dgkq	0.00257427
GO:0048514	blood vessel morphogenesis	3	3	56	22	4164	Serpinf2,Angpt2,Hey2	0.00296054
GO:0042446	hormone biosynthetic process	3	2	56	8	4164	Scarb1,Srd5a2	0.00472288
GO:0006706	steroid catabolic process	5	2	56	9	4164	Scarb1,Srd5a2	0.00602003
GO:0010883	regulation of lipid storage	4	2	56	10	4164	Mest,Scarb1	0.00746037
GO:0019935	cyclic-nucleotide-mediated signaling	6	2	56	10	4164	Adcy8,Dgkq	0.00746037
GO:0035813	regulation of renal sodium excretion	5	2	56	10	4164	Avpr1a,Corin	0.00746037
GO:0044062	regulation of excretion	5	2	56	11	4164	Avpr1a,Corin	0.00903994
