# Supplementary material for: Integrative Analysis Using Module-Guided Random Forests Reveals Correlated Genetic Factors Related to Mouse Weight
Source: PLoS Comput Biol. 2013 Mar 7;9(3):e1002956. doi: 10.1371/journal.pcbi.1002956 (PMC3591263; doi:10.1371/journal.pcbi.1002956)
Supplement: Table S11 — Top 500 significant pair-wise SNP-to-SNP interactions. (XLSX) [file pcbi.1002956.s016.xlsx]

## Sheet: SNP-to-SNP
Table S11. Top-500 SNP-to-SNP interactions
SNP1	SNP 1 Position	SNP2	SNP 2 Position	Count 1	Count 2	Joint Count	p-value
p45558	Chr 5, 123Mb	p44890	Chr 19, 51Mb	2000	1060	446	3.342e-11
p45558	Chr 5, 123Mb	p46123	Chr 19, 42Mb	2000	1036	433	2.314e-10
p45558	Chr 5, 123Mb	p44892	Chr 19, 52Mb	2000	1109	453	3.844e-09
p45975	Chr 5, 47Mb	p45558	Chr 5, 123Mb	1269	2000	507	1.479e-08
p45558	Chr 5, 123Mb	p44593	Chr 15, 80Mb	2000	1256	500	3.563e-08
p45276	Chr 1, 146Mb	p45558	Chr 5, 123Mb	619	2000	266	8.092e-08
p46441	Chr 5, 9Mb	p46012	Chr 9, 97Mb	1049	739	180	2.626e-07
p44609	Chr 5, 116Mb	p45558	Chr 5, 123Mb	1038	2000	415	4.644e-07
p45558	Chr 5, 123Mb	p44808	Chr 19, 55Mb	2000	2367	877	5.029e-07
p45541	Chr 2, 96Mb	p45882	Chr 9, 61Mb	492	483	70	8.971e-07
p45558	Chr 5, 123Mb	p45915	Chr 19, 52Mb	2000	991	395	1.423e-06
p46441	Chr 5, 9Mb	p45558	Chr 5, 123Mb	1049	2000	415	1.851e-06
p45319	Chr 5, 144Mb	p45229	Chr 19, 47Mb	645	748	119	2.323e-06
p45920	Chr 1, 127Mb	p44739	Chr 5, 46Mb	616	1063	152	2.7e-06
p46143	Chr 1, 142Mb	p45975	Chr 5, 47Mb	801	1269	220	2.836e-06
p46399	Chr 1, 41Mb	p45127	Chr 15, 62Mb	469	543	72	2.936e-06
p44942	Chr 3, 84Mb	p45977	Chr 5, 131Mb	403	575	67	2.992e-06
p45558	Chr 5, 123Mb	p44592	Chr 15, 83Mb	2000	1187	462	3.624e-06
p46082	Chr 4, 43Mb	p44782	Chr 11, 116Mb	422	1530	148	3.67e-06
p45933	Chr 11, 56Mb	p45061	Chr 19, 6Mb	278	292	32	3.708e-06
p46441	Chr 5, 9Mb	p45378	Chr 15, 6Mb	1049	773	181	4.1e-06
p46028	Chr 5, 24Mb	p44972	Chr 9, 61Mb	544	457	70	4.759e-06
p45558	Chr 5, 123Mb	p44688	Chr 15, 79Mb	2000	1249	483	4.784e-06
p45788	Chr 1, 135Mb	p45558	Chr 5, 123Mb	604	2000	251	5.154e-06
p45860	Chr 1, 176Mb	p44699	Chr 19, 56Mb	977	2183	417	5.402e-06
p45092	Chr 5, 20Mb	p45558	Chr 5, 123Mb	813	2000	327	5.701e-06
p46172	Chr 2, 89Mb	p46173	Chr 2, 129Mb	328	352	40	5.798e-06
p45633	Chr 8, 126Mb	p45035	Chr 12, 78Mb	335	396	44	6.065e-06
p45057	Chr 17, 55Mb	p45823	Chr 18, 12Mb	251	286	29	6.744e-06
p45505	Chr 1, 177Mb	p45558	Chr 5, 123Mb	1018	2000	400	6.895e-06
p45489	Chr 11, 70Mb	p45054	Chr 16, 44Mb	235	462	38	7.257e-06
p45376	Chr 15, 23Mb	p44690	Chr 15, 89Mb	807	771	144	7.353e-06
p46350	Chr 14, 17Mb	p44697	Chr 17, 89Mb	728	506	94	7.551e-06
p46305	Chr 2, 90Mb	p46220	Chr 4, 94Mb	416	354	47	8.238e-06
p45558	Chr 5, 123Mb	p44811	Chr 19, 52Mb	2000	1141	443	8.517e-06
p45277	Chr 10, 96Mb	p44595	Chr 15, 66Mb	287	337	35	8.921e-06
p45504	Chr 1, 146Mb	p45975	Chr 5, 47Mb	848	1269	228	9.773e-06
p45665	Chr 14, 70Mb	p44686	Chr 15, 59Mb	296	563	51	1.007e-05
p45558	Chr 5, 123Mb	p46162	Chr 15, 29Mb	2000	954	376	1.009e-05
p45639	Chr 1, 190Mb	p44689	Chr 15, 87Mb	637	935	138	1.05e-05
p45558	Chr 5, 123Mb	p45289	Chr 19, 60Mb	2000	1039	406	1.107e-05
p45026	Chr 10, 101Mb	p45662	Chr 13, 21Mb	932	871	179	1.108e-05
p45647	Chr 1, 42Mb	p45995	Chr 14, 8Mb	688	620	105	1.136e-05
p44629	Chr 1, 102Mb	p45726	Chr 9, 77Mb	317	543	52	1.226e-05
p45558	Chr 5, 123Mb	p44995	Chr 15, 95Mb	2000	1074	418	1.264e-05
p45860	Chr 1, 176Mb	p45558	Chr 5, 123Mb	977	2000	383	1.492e-05
p45182	Chr 1, 128Mb	p45558	Chr 5, 123Mb	579	2000	239	1.584e-05
p44942	Chr 3, 84Mb	p45286	Chr 16, 49Mb	403	397	49	1.648e-05
p45679	Chr 17, 77Mb	p45449	Chr 19, 2Mb	254	296	29	1.662e-05
p44549	Chr 4, 61Mb	p44561	Chr 11, 107Mb	285	485	44	1.667e-05
p44674	Chr 11, 94Mb	p46350	Chr 14, 17Mb	496	728	91	1.804e-05
p44689	Chr 15, 87Mb	p44890	Chr 19, 51Mb	935	1060	211	1.841e-05
p44739	Chr 5, 46Mb	p45429	Chr 9, 90Mb	1063	622	149	1.974e-05
p45695	Chr 3, 161Mb	p45272	Chr 9, 96Mb	1590	541	185	2e-05
p46399	Chr 1, 41Mb	p45057	Chr 17, 55Mb	469	251	39	2.057e-05
p45860	Chr 1, 176Mb	p45727	Chr 9, 104Mb	977	507	117	2.086e-05
p45314	Chr 2, 155Mb	p45137	Chr 9, 86Mb	559	542	79	2.141e-05
p45558	Chr 5, 123Mb	p45062	Chr 19, 60Mb	2000	986	385	2.182e-05
p45647	Chr 1, 42Mb	p46143	Chr 1, 142Mb	688	801	128	2.202e-05
p45302	Chr 10, 87Mb	p46241	Chr 19, 11Mb	305	700	60	2.226e-05
p45925	Chr 1, 51Mb	p45630	Chr 9, 37Mb	803	216	51	2.289e-05
p45295	Chr 5, 88Mb	p45441	Chr 15, 6Mb	261	678	52	2.333e-05
p44609	Chr 5, 116Mb	p44995	Chr 15, 95Mb	1038	1074	233	2.373e-05
p45017	Chr 1, 69Mb	p44739	Chr 5, 46Mb	739	1063	172	2.5e-05
p45558	Chr 5, 123Mb	p44728	Chr 9, 92Mb	2000	725	291	2.509e-05
p45628	Chr 7, 51Mb	p44575	Chr 9, 74Mb	376	469	52	2.574e-05
p45727	Chr 9, 104Mb	p45532	Chr 17, 82Mb	507	295	46	2.591e-05
p44994	Chr 15, 13Mb	p44890	Chr 19, 51Mb	1048	1060	232	2.633e-05
p46221	Chr 6, 45Mb	p44691	Chr 15, 58Mb	355	563	57	2.657e-05
p46015	Chr 1, 36Mb	p44567	Chr 9, 82Mb	493	340	50	2.687e-05
p45395	Chr 2, 70Mb	p45161	Chr 7, 61Mb	615	528	83	2.731e-05
p45181	Chr 1, 82Mb	p45860	Chr 1, 176Mb	637	977	141	2.754e-05
p45746	Chr 2, 82Mb	p45026	Chr 10, 101Mb	325	932	78	2.763e-05
p45792	Chr 1, 165Mb	p46441	Chr 5, 9Mb	370	1049	95	2.819e-05
p44514	Chr 2, 133Mb	p44767	Chr 17, 44Mb	468	359	50	2.905e-05
p45267	Chr 8, 25Mb	p46384	Chr 14, 53Mb	294	250	28	2.95e-05
p45855	Chr 9, 87Mb	p44593	Chr 15, 80Mb	663	1256	180	2.977e-05
p45255	Chr 6, 5Mb	p44723	Chr 8, 125Mb	509	331	50	3.056e-05
p44629	Chr 1, 102Mb	p46424	Chr 8, 40Mb	317	561	52	3.064e-05
p44882	Chr 9, 56Mb	p45916	Chr 19, 52Mb	616	970	136	3.091e-05
p46041	Chr 1, 96Mb	p44726	Chr 9, 65Mb	799	397	81	3.134e-05
p46145	Chr 1, 150Mb	p46073	Chr 18, 7Mb	532	343	53	3.173e-05
p45783	Chr 11, 87Mb	p44917	Chr 14, 25Mb	425	573	66	3.221e-05
p45920	Chr 1, 127Mb	p44955	Chr 5, 30Mb	616	685	102	3.408e-05
p45045	Chr 14, 112Mb	p45781	Chr 18, 63Mb	375	320	39	3.427e-05
p46334	Chr 3, 47Mb	p44483	Chr 19, 4Mb	208	647	42	3.506e-05
p45920	Chr 1, 127Mb	p45809	Chr 14, 37Mb	616	366	62	3.523e-05
p44929	Chr 17, 63Mb	p45446	Chr 18, 12Mb	295	335	34	3.546e-05
p46315	Chr 6, 55Mb	p44731	Chr 10, 58Mb	1194	500	135	3.694e-05
p45746	Chr 2, 82Mb	p44696	Chr 17, 11Mb	325	384	40	3.729e-05
p46172	Chr 2, 89Mb	p46036	Chr 8, 130Mb	328	354	38	3.738e-05
p46369	Chr 15, 71Mb	p45618	Chr 17, 28Mb	582	833	114	3.751e-05
p45558	Chr 5, 123Mb	p44973	Chr 9, 78Mb	2000	651	263	3.795e-05
p45504	Chr 1, 146Mb	p45558	Chr 5, 123Mb	848	2000	334	3.825e-05
p45662	Chr 13, 21Mb	p45941	Chr 13, 64Mb	871	424	91	3.96e-05
p45505	Chr 1, 177Mb	p45328	Chr 5, 117Mb	1018	793	175	3.963e-05
p46143	Chr 1, 142Mb	p45558	Chr 5, 123Mb	801	2000	317	4.021e-05
p45127	Chr 15, 62Mb	p45531	Chr 17, 69Mb	543	356	55	4.027e-05
p45558	Chr 5, 123Mb	p45137	Chr 9, 86Mb	2000	542	223	4.05e-05
p44507	Chr 7, 38Mb	p46036	Chr 8, 130Mb	246	354	31	4.089e-05
p45872	Chr 2, 146Mb	p45617	Chr 15, 89Mb	711	380	71	4.125e-05
p44588	Chr 12, 72Mb	p44795	Chr 15, 102Mb	473	748	88	4.155e-05
p45461	Chr 1, 159Mb	p45296	Chr 5, 20Mb	488	956	110	4.179e-05
p46244	Chr 2, 20Mb	p45630	Chr 9, 37Mb	1305	216	72	4.187e-05
p45339	Chr 1, 135Mb	p44849	Chr 1, 196Mb	582	414	65	4.284e-05
p45276	Chr 1, 146Mb	p46441	Chr 5, 9Mb	619	1049	145	4.317e-05
p44758	Chr 7, 58Mb	p45857	Chr 9, 83Mb	291	541	47	4.469e-05
p45542	Chr 2, 122Mb	p45026	Chr 10, 101Mb	324	932	77	4.472e-05
p46310	Chr 4, 86Mb	p45972	Chr 5, 102Mb	318	567	52	4.475e-05
p45924	Chr 1, 172Mb	p46019	Chr 13, 69Mb	1096	503	126	4.542e-05
p45313	Chr 2, 127Mb	p45052	Chr 15, 40Mb	267	506	42	4.559e-05
p44924	Chr 16, 49Mb	p45312	Chr 19, 24Mb	441	336	45	4.578e-05
p46446	Chr 7, 84Mb	p46296	Chr 14, 43Mb	473	381	52	4.684e-05
p46143	Chr 1, 142Mb	p45915	Chr 19, 52Mb	801	991	172	4.866e-05
p45297	Chr 5, 30Mb	p45558	Chr 5, 123Mb	825	2000	325	4.894e-05
p44995	Chr 15, 95Mb	p44811	Chr 19, 52Mb	1074	1141	251	4.913e-05
p44989	Chr 3, 160Mb	p46067	Chr 16, 53Mb	1642	444	158	4.98e-05
p46341	Chr 1, 48Mb	p45535	Chr 18, 13Mb	878	429	92	5.07e-05
p45808	Chr 14, 94Mb	p45222	Chr 17, 8Mb	249	492	39	5.078e-05
p45923	Chr 1, 46Mb	p45975	Chr 5, 47Mb	902	1269	236	5.25e-05
p45430	Chr 9, 92Mb	p44892	Chr 19, 52Mb	679	1109	164	5.255e-05
p44735	Chr 2, 20Mb	p45187	Chr 10, 96Mb	1361	289	94	5.31e-05
p44717	Chr 6, 43Mb	p46009	Chr 8, 68Mb	364	254	32	5.338e-05
p44783	Chr 11, 55Mb	p46296	Chr 14, 43Mb	356	381	42	5.381e-05
p44658	Chr 9, 13Mb	p44914	Chr 13, 78Mb	516	498	68	5.384e-05
p45313	Chr 2, 127Mb	p46028	Chr 5, 24Mb	267	544	44	5.498e-05
p45910	Chr 9, 53Mb	p45762	Chr 15, 52Mb	524	528	72	5.558e-05
p44605	Chr 2, 102Mb	p44595	Chr 15, 66Mb	377	337	40	5.632e-05
p44667	Chr 1, 74Mb	p46262	Chr 9, 82Mb	630	394	66	5.741e-05
p45192	Chr 11, 57Mb	p45057	Chr 17, 55Mb	272	251	26	5.815e-05
p45991	Chr 1, 51Mb	p44889	Chr 9, 49Mb	834	405	84	5.879e-05
p46441	Chr 5, 9Mb	p44689	Chr 15, 87Mb	1049	935	206	5.931e-05
p45746	Chr 2, 82Mb	p44997	Chr 17, 23Mb	325	392	40	5.973e-05
p45502	Chr 9, 12Mb	p45034	Chr 12, 55Mb	390	384	45	6.031e-05
p44567	Chr 9, 82Mb	p44544	Chr 18, 9Mb	340	401	42	6.052e-05
p45959	Chr 2, 149Mb	p45405	Chr 4, 138Mb	554	388	59	6.073e-05
p45960	Chr 2, 57Mb	p45953	Chr 18, 38Mb	377	193	27	6.191e-05
p45920	Chr 1, 127Mb	p45639	Chr 1, 190Mb	616	637	95	6.247e-05
p45008	Chr 1, 187Mb	p45137	Chr 9, 86Mb	622	542	84	6.301e-05
p45876	Chr 3, 154Mb	p44599	Chr 16, 38Mb	531	292	46	6.382e-05
p45506	Chr 1, 26Mb	p44605	Chr 2, 102Mb	351	377	41	6.553e-05
p45504	Chr 1, 146Mb	p45618	Chr 17, 28Mb	848	833	155	6.571e-05
p44717	Chr 6, 43Mb	p45309	Chr 13, 83Mb	364	438	47	6.584e-05
p45792	Chr 1, 165Mb	p45429	Chr 9, 90Mb	370	622	62	6.608e-05
p44735	Chr 2, 20Mb	p45542	Chr 2, 122Mb	1361	324	103	6.633e-05
p44502	Chr 4, 140Mb	p46088	Chr 6, 38Mb	269	301	29	6.678e-05
p46192	Chr 8, 77Mb	p44723	Chr 8, 125Mb	321	331	35	6.761e-05
p45092	Chr 5, 20Mb	p44870	Chr 9, 68Mb	813	466	92	6.769e-05
p45975	Chr 5, 47Mb	p46123	Chr 19, 42Mb	1269	1036	266	6.852e-05
p45154	Chr 3, 127Mb	p44680	Chr 13, 96Mb	311	370	37	6.945e-05
p45436	Chr 13, 41Mb	p46157	Chr 13, 116Mb	430	569	65	6.979e-05
p45390	Chr 2, 136Mb	p45612	Chr 11, 53Mb	735	328	64	7.166e-05
p44586	Chr 1, 93Mb	p44738	Chr 5, 127Mb	689	535	90	7.174e-05
p46172	Chr 2, 89Mb	p44523	Chr 9, 13Mb	328	447	44	7.425e-05
p45390	Chr 2, 136Mb	p45995	Chr 14, 8Mb	735	620	107	7.461e-05
p45159	Chr 8, 127Mb	p45882	Chr 9, 61Mb	267	483	40	7.462e-05
p44831	Chr 6, 34Mb	p45288	Chr 18, 49Mb	336	195	25	7.598e-05
p45025	Chr 10, 55Mb	p45148	Chr 17, 49Mb	499	259	40	7.734e-05
p46315	Chr 6, 55Mb	p45502	Chr 9, 12Mb	1194	390	108	7.773e-05
p45457	Chr 7, 64Mb	p46208	Chr 8, 102Mb	460	379	50	7.792e-05
p46256	Chr 6, 35Mb	p45465	Chr 13, 87Mb	304	296	31	7.819e-05
p45703	Chr 4, 113Mb	p45363	Chr 12, 11Mb	256	488	39	7.929e-05
p44503	Chr 5, 77Mb	p45903	Chr 7, 77Mb	197	354	26	7.989e-05
p45808	Chr 14, 94Mb	p45210	Chr 15, 6Mb	249	650	47	8.139e-05
p45297	Chr 5, 30Mb	p45329	Chr 15, 42Mb	825	517	101	8.258e-05
p45788	Chr 1, 135Mb	p45505	Chr 1, 177Mb	604	1018	137	8.275e-05
p45965	Chr 3, 124Mb	p46097	Chr 8, 59Mb	493	281	42	8.352e-05
p46143	Chr 1, 142Mb	p45628	Chr 7, 51Mb	801	376	76	8.421e-05
p45202	Chr 13, 16Mb	p44695	Chr 16, 32Mb	721	303	59	8.501e-05
p45461	Chr 1, 159Mb	p44593	Chr 15, 80Mb	488	1256	136	8.564e-05
p44502	Chr 4, 140Mb	p45213	Chr 16, 66Mb	269	352	32	8.566e-05
p44586	Chr 1, 93Mb	p46162	Chr 15, 29Mb	689	954	145	8.756e-05
p45925	Chr 1, 51Mb	p44916	Chr 14, 92Mb	803	159	39	8.773e-05
p46360	Chr 4, 17Mb	p45278	Chr 11, 58Mb	318	298	32	8.782e-05
p45504	Chr 1, 146Mb	p44995	Chr 15, 95Mb	848	1074	192	8.896e-05
p45923	Chr 1, 46Mb	p45872	Chr 2, 146Mb	902	711	142	8.907e-05
p44647	Chr 4, 143Mb	p46105	Chr 14, 93Mb	344	181	24	8.941e-05
p44992	Chr 1, 187Mb	p45289	Chr 19, 60Mb	731	1039	164	8.966e-05
p46382	Chr 1, 142Mb	p44728	Chr 9, 92Mb	610	725	104	8.99e-05
p45181	Chr 1, 82Mb	p46316	Chr 7, 53Mb	637	255	47	9.051e-05
p44556	Chr 9, 110Mb	p44929	Chr 17, 63Mb	351	295	34	9.17e-05
p44995	Chr 15, 95Mb	p45915	Chr 19, 52Mb	1074	991	220	9.187e-05
p45861	Chr 1, 66Mb	p46441	Chr 5, 9Mb	822	1049	183	9.197e-05
p45182	Chr 1, 128Mb	p45762	Chr 15, 52Mb	579	528	77	9.235e-05
p44989	Chr 3, 160Mb	p45558	Chr 5, 123Mb	1642	2000	609	9.241e-05
p45504	Chr 1, 146Mb	p44973	Chr 9, 78Mb	848	651	125	9.289e-05
p46399	Chr 1, 41Mb	p44658	Chr 9, 13Mb	469	516	64	9.301e-05
p45263	Chr 8, 21Mb	p45781	Chr 18, 63Mb	351	320	36	9.389e-05
p46273	Chr 5, 66Mb	p44881	Chr 7, 112Mb	238	347	29	9.392e-05
p45855	Chr 9, 87Mb	p44569	Chr 10, 18Mb	663	522	85	9.493e-05
p46047	Chr 1, 37Mb	p44790	Chr 13, 71Mb	369	489	51	9.558e-05
p45175	Chr 1, 153Mb	p45792	Chr 1, 165Mb	539	370	55	9.685e-05
p45237	Chr 3, 87Mb	p45657	Chr 12, 107Mb	448	321	43	9.794e-05
p45424	Chr 7, 131Mb	p45126	Chr 12, 31Mb	1613	253	95	9.834e-05
p44549	Chr 4, 61Mb	p44650	Chr 6, 54Mb	285	1162	81	9.854e-05
p46137	Chr 8, 58Mb	p45347	Chr 10, 58Mb	341	435	44	9.858e-05
p45092	Chr 5, 20Mb	p44728	Chr 9, 92Mb	813	725	132	9.872e-05
p46209	Chr 1, 34Mb	p44667	Chr 1, 74Mb	378	630	63	9.952e-05
p45013	Chr 1, 193Mb	p45915	Chr 19, 52Mb	398	991	94	9.962e-05
p45671	Chr 15, 32Mb	p45762	Chr 15, 52Mb	714	528	91	9.965e-05
p45246	Chr 4, 131Mb	p46315	Chr 6, 55Mb	192	1194	60	0.0001005
p44656	Chr 6, 65Mb	p45061	Chr 19, 6Mb	137	292	18	0.0001007
p45339	Chr 1, 135Mb	p45376	Chr 15, 23Mb	582	807	109	0.0001015
p45494	Chr 4, 86Mb	p45335	Chr 9, 13Mb	341	463	46	0.0001044
p44673	Chr 10, 68Mb	p44783	Chr 11, 55Mb	522	356	52	0.0001044
p46294	Chr 11, 15Mb	p45672	Chr 15, 101Mb	642	564	88	0.0001048
p44995	Chr 15, 95Mb	p44890	Chr 19, 51Mb	1074	1060	233	0.0001064
p46145	Chr 1, 150Mb	p45440	Chr 15, 98Mb	532	875	108	0.0001065
p44605	Chr 2, 102Mb	p45446	Chr 18, 12Mb	377	335	39	0.0001073
p45232	Chr 2, 101Mb	p46098	Chr 8, 32Mb	364	447	47	0.0001089
p45251	Chr 5, 143Mb	p45440	Chr 15, 98Mb	754	875	145	0.0001091
p45886	Chr 1, 165Mb	p44843	Chr 9, 98Mb	508	556	72	0.0001092
p45860	Chr 1, 176Mb	p45092	Chr 5, 20Mb	977	813	170	0.0001106
p45765	Chr 2, 121Mb	p44741	Chr 6, 6Mb	406	470	53	0.0001112
p44750	Chr 15, 42Mb	p46355	Chr 19, 40Mb	637	796	116	0.0001123
p46147	Chr 1, 173Mb	p44609	Chr 5, 116Mb	949	1038	205	0.0001123
p44858	Chr 2, 118Mb	p45136	Chr 8, 104Mb	468	368	49	0.0001127
p46143	Chr 1, 142Mb	p44890	Chr 19, 51Mb	801	1060	180	0.0001127
p45082	Chr 4, 146Mb	p45032	Chr 12, 61Mb	379	430	47	0.0001138
p46002	Chr 2, 111Mb	p46208	Chr 8, 102Mb	430	379	47	0.0001138
p44619	Chr 9, 66Mb	p45762	Chr 15, 52Mb	318	528	48	0.0001141
p44639	Chr 1, 33Mb	p44758	Chr 7, 58Mb	345	291	33	0.0001146
p46041	Chr 1, 96Mb	p46088	Chr 6, 38Mb	799	301	63	0.0001148
p46041	Chr 1, 96Mb	p45008	Chr 1, 187Mb	799	622	114	0.0001154
p45628	Chr 7, 51Mb	p45324	Chr 17, 9Mb	376	349	40	0.0001162
p44813	Chr 2, 172Mb	p46160	Chr 13, 73Mb	283	417	37	0.0001164
p45068	Chr 2, 71Mb	p44683	Chr 13, 112Mb	530	525	71	0.0001189
p46033	Chr 3, 74Mb	p45489	Chr 11, 70Mb	411	235	32	0.0001212
p44942	Chr 3, 84Mb	p45026	Chr 10, 101Mb	403	932	90	0.0001219
p45255	Chr 6, 5Mb	p45025	Chr 10, 55Mb	509	499	66	0.0001228
p45996	Chr 14, 39Mb	p44750	Chr 15, 42Mb	430	637	70	0.0001229
p45004	Chr 6, 36Mb	p45528	Chr 16, 93Mb	405	303	38	0.0001233
p45025	Chr 10, 55Mb	p44604	Chr 19, 36Mb	499	451	60	0.000125
p45440	Chr 15, 98Mb	p45535	Chr 18, 13Mb	875	429	90	0.0001258
p45494	Chr 4, 86Mb	p44998	Chr 18, 69Mb	341	360	38	0.0001258
p45200	Chr 13, 67Mb	p45059	Chr 18, 28Mb	365	1235	104	0.0001258
p45019	Chr 1, 191Mb	p44811	Chr 19, 52Mb	517	1141	131	0.0001267
p45506	Chr 1, 26Mb	p44744	Chr 7, 38Mb	351	216	27	0.0001292
p45565	Chr 6, 17Mb	p46009	Chr 8, 68Mb	521	254	40	0.0001292
p46382	Chr 1, 142Mb	p44811	Chr 19, 52Mb	610	1141	151	0.0001296
p44556	Chr 9, 110Mb	p46280	Chr 18, 42Mb	351	193	25	0.0001298
p44514	Chr 2, 133Mb	p45891	Chr 14, 6Mb	468	523	64	0.0001304
p45327	Chr 8, 70Mb	p45511	Chr 10, 26Mb	252	454	36	0.0001306
p45870	Chr 16, 55Mb	p44478	Chr 19, 5Mb	423	556	62	0.0001309
p46044	Chr 1, 30Mb	p45280	Chr 11, 63Mb	353	336	37	0.0001321
p45558	Chr 5, 123Mb	p44693	Chr 15, 87Mb	2000	1023	392	0.0001323
p45137	Chr 9, 86Mb	p45928	Chr 10, 20Mb	542	443	63	0.0001329
p45315	Chr 2, 106Mb	p45446	Chr 18, 12Mb	408	335	41	0.0001354
p44549	Chr 4, 61Mb	p45327	Chr 8, 70Mb	285	252	26	0.0001356
p44967	Chr 8, 19Mb	p44782	Chr 11, 116Mb	248	1530	89	0.0001368
p46192	Chr 8, 77Mb	p45530	Chr 16, 99Mb	321	237	27	0.0001393
p45175	Chr 1, 153Mb	p45135	Chr 7, 56Mb	539	297	46	0.0001394
p44774	Chr 1, 24Mb	p45017	Chr 1, 69Mb	340	739	65	0.0001398
p45019	Chr 1, 191Mb	p45272	Chr 9, 96Mb	517	541	71	0.0001401
p45506	Chr 1, 26Mb	p45502	Chr 9, 12Mb	351	390	41	0.0001406
p46047	Chr 1, 37Mb	p45893	Chr 17, 17Mb	369	446	47	0.0001439
p45343	Chr 1, 116Mb	p45577	Chr 9, 70Mb	566	460	67	0.0001448
p45479	Chr 4, 93Mb	p45909	Chr 13, 66Mb	273	341	31	0.0001465
p45276	Chr 1, 146Mb	p45019	Chr 1, 191Mb	619	517	79	0.0001466
p45162	Chr 1, 33Mb	p46098	Chr 8, 32Mb	474	447	57	0.0001467
p45511	Chr 10, 26Mb	p45378	Chr 15, 6Mb	454	773	85	0.0001475
p44774	Chr 1, 24Mb	p46128	Chr 4, 141Mb	340	274	31	0.0001485
p46174	Chr 2, 75Mb	p44844	Chr 9, 75Mb	440	364	46	0.0001487
p44939	Chr 2, 85Mb	p44758	Chr 7, 58Mb	395	291	36	0.000149
p46188	Chr 6, 141Mb	p45213	Chr 16, 66Mb	482	352	48	0.0001517
p45016	Chr 1, 93Mb	p44739	Chr 5, 46Mb	641	1063	148	0.0001524
p45689	Chr 2, 82Mb	p46028	Chr 5, 24Mb	304	544	47	0.0001538
p45161	Chr 7, 61Mb	p44673	Chr 10, 68Mb	528	522	70	0.0001544
p45175	Chr 1, 153Mb	p45975	Chr 5, 47Mb	539	1269	148	0.0001546
p45975	Chr 5, 47Mb	p45062	Chr 19, 60Mb	1269	986	252	0.0001571
p45746	Chr 2, 82Mb	p45580	Chr 9, 35Mb	325	314	33	0.0001576
p46266	Chr 12, 29Mb	p46058	Chr 14, 99Mb	304	212	24	0.0001586
p45318	Chr 5, 147Mb	p45045	Chr 14, 112Mb	1837	375	147	0.0001602
p45923	Chr 1, 46Mb	p45616	Chr 15, 53Mb	902	556	114	0.0001616
p45473	Chr 3, 101Mb	p46315	Chr 6, 55Mb	427	1194	115	0.0001619
p44815	Chr 2, 6Mb	p45170	Chr 9, 13Mb	2682	520	272	0.0001624
p45365	Chr 13, 115Mb	p44600	Chr 17, 80Mb	528	279	43	0.0001626
p45462	Chr 1, 73Mb	p45378	Chr 15, 6Mb	757	773	130	0.0001641
p45395	Chr 2, 70Mb	p45052	Chr 15, 40Mb	615	506	77	0.0001661
p44670	Chr 1, 138Mb	p44609	Chr 5, 116Mb	535	1038	124	0.0001664
p45389	Chr 2, 118Mb	p46159	Chr 13, 88Mb	327	313	33	0.0001667
p44955	Chr 5, 30Mb	p45127	Chr 15, 62Mb	685	543	89	0.000167
p45505	Chr 1, 177Mb	p45092	Chr 5, 20Mb	1018	813	175	0.0001685
p45277	Chr 10, 96Mb	p45618	Chr 17, 28Mb	287	833	62	0.0001692
p45255	Chr 6, 5Mb	p44618	Chr 8, 66Mb	509	281	42	0.0001718
p45506	Chr 1, 26Mb	p44560	Chr 10, 84Mb	351	355	38	0.0001722
p45483	Chr 7, 31Mb	p45662	Chr 13, 21Mb	242	871	56	0.0001724
p45343	Chr 1, 116Mb	p45092	Chr 5, 20Mb	566	813	106	0.0001728
p46221	Chr 6, 45Mb	p44928	Chr 17, 48Mb	355	253	30	0.0001769
p46143	Chr 1, 142Mb	p45297	Chr 5, 30Mb	801	825	144	0.0001782
p45860	Chr 1, 176Mb	p45409	Chr 5, 49Mb	977	688	146	0.0001789
p44726	Chr 9, 65Mb	p45511	Chr 10, 26Mb	397	454	50	0.000182
p45628	Chr 7, 51Mb	p45127	Chr 15, 62Mb	376	543	55	0.0001824
p44587	Chr 12, 95Mb	p44483	Chr 19, 4Mb	346	647	59	0.0001832
p45347	Chr 10, 58Mb	p44601	Chr 17, 9Mb	435	393	48	0.0001852
p45506	Chr 1, 26Mb	p46083	Chr 4, 115Mb	351	209	26	0.0001864
p46382	Chr 1, 142Mb	p44767	Chr 17, 44Mb	610	359	58	0.0001864
p45462	Chr 1, 73Mb	p45924	Chr 1, 172Mb	757	1096	175	0.0001866
p45654	Chr 11, 43Mb	p45050	Chr 14, 114Mb	407	490	54	0.0001868
p45558	Chr 5, 123Mb	p45210	Chr 15, 6Mb	2000	650	258	0.0001868
p46193	Chr 8, 64Mb	p45036	Chr 12, 64Mb	220	430	31	0.000187
p44500	Chr 2, 178Mb	p44785	Chr 12, 87Mb	608	416	65	0.0001873
p46382	Chr 1, 142Mb	p44655	Chr 1, 190Mb	610	662	95	0.0001882
p46184	Chr 5, 88Mb	p45528	Chr 16, 93Mb	176	303	21	0.0001882
p45429	Chr 9, 90Mb	p46344	Chr 10, 13Mb	622	399	64	0.0001887
p45911	Chr 3, 82Mb	p45440	Chr 15, 98Mb	581	875	115	0.0001888
p45991	Chr 1, 51Mb	p44588	Chr 12, 72Mb	834	473	93	0.0001896
p44915	Chr 13, 75Mb	p45616	Chr 15, 53Mb	446	556	64	0.0001898
p45861	Chr 1, 66Mb	p45296	Chr 5, 20Mb	822	956	167	0.0001904
p45196	Chr 12, 48Mb	p45739	Chr 13, 94Mb	216	340	26	0.0001911
p44741	Chr 6, 6Mb	p45633	Chr 8, 126Mb	470	335	45	0.0001952
p44817	Chr 2, 74Mb	p44736	Chr 3, 52Mb	524	190	32	0.0001953
p45505	Chr 1, 177Mb	p44995	Chr 15, 95Mb	1018	1074	223	0.0001962
p45133	Chr 5, 106Mb	p44722	Chr 7, 68Mb	382	486	51	0.0001986
p46097	Chr 8, 59Mb	p45592	Chr 16, 13Mb	281	681	52	0.0001989
p45717	Chr 8, 56Mb	p45025	Chr 10, 55Mb	316	499	45	0.000199
p44741	Chr 6, 6Mb	p44867	Chr 8, 35Mb	470	395	51	0.0001995
p45790	Chr 1, 87Mb	p46303	Chr 17, 15Mb	812	344	70	0.0001995
p45998	Chr 15, 6Mb	p44767	Chr 17, 44Mb	571	359	55	0.0001999
p46147	Chr 1, 173Mb	p44952	Chr 5, 26Mb	949	648	135	0.0002005
p44758	Chr 7, 58Mb	p45465	Chr 13, 87Mb	291	296	29	0.0002011
p45067	Chr 2, 162Mb	p46123	Chr 19, 42Mb	403	1036	97	0.0002025
p44758	Chr 7, 58Mb	p44928	Chr 17, 48Mb	291	253	26	0.000203
p44669	Chr 1, 105Mb	p45882	Chr 9, 61Mb	464	483	59	0.0002034
p45232	Chr 2, 101Mb	p44867	Chr 8, 35Mb	364	395	42	0.0002034
p46382	Chr 1, 142Mb	p44592	Chr 15, 83Mb	610	1187	155	0.0002038
p46172	Chr 2, 89Mb	p44814	Chr 2, 173Mb	328	597	53	0.0002055
p46408	Chr 1, 159Mb	p44591	Chr 14, 52Mb	466	523	63	0.000206
p46359	Chr 3, 42Mb	p44799	Chr 16, 23Mb	223	223	20	0.000208
p44918	Chr 14, 20Mb	p44496	Chr 17, 3Mb	648	609	93	0.0002084
p44858	Chr 2, 118Mb	p45137	Chr 9, 86Mb	468	542	65	0.0002087
p44526	Chr 10, 84Mb	p45287	Chr 17, 48Mb	341	291	32	0.0002089
p45179	Chr 1, 178Mb	p45210	Chr 15, 6Mb	759	650	112	0.0002089
p44880	Chr 7, 94Mb	p45935	Chr 11, 27Mb	317	558	49	0.000209
p45984	Chr 8, 86Mb	p45891	Chr 14, 6Mb	329	523	48	0.0002094
p45390	Chr 2, 136Mb	p46316	Chr 7, 53Mb	735	255	51	0.0002097
p45911	Chr 3, 82Mb	p45026	Chr 10, 101Mb	581	932	121	0.0002099
p45979	Chr 6, 26Mb	p45124	Chr 10, 121Mb	318	410	39	0.0002104
p45338	Chr 1, 172Mb	p45656	Chr 12, 27Mb	829	422	84	0.0002105
p45405	Chr 4, 138Mb	p45928	Chr 10, 20Mb	388	443	48	0.0002108
p45343	Chr 1, 116Mb	p44892	Chr 19, 52Mb	566	1109	137	0.0002114
p45247	Chr 5, 89Mb	p45826	Chr 19, 10Mb	181	603	34	0.0002123
p44756	Chr 3, 152Mb	p45124	Chr 10, 121Mb	454	410	51	0.0002138
p45462	Chr 1, 73Mb	p45526	Chr 15, 72Mb	757	659	113	0.000214
p45505	Chr 1, 177Mb	p44811	Chr 19, 52Mb	1018	1141	235	0.0002143
p46282	Chr 2, 114Mb	p44790	Chr 13, 71Mb	410	489	54	0.0002145
p44728	Chr 9, 92Mb	p44700	Chr 19, 4Mb	725	790	127	0.0002153
p45788	Chr 1, 135Mb	p44880	Chr 7, 94Mb	604	317	52	0.0002153
p44576	Chr 9, 13Mb	p45722	Chr 9, 43Mb	531	405	57	0.0002167
p46382	Chr 1, 142Mb	p44825	Chr 5, 50Mb	610	707	100	0.0002174
p45389	Chr 2, 118Mb	p45403	Chr 4, 55Mb	327	358	36	0.0002178
p45130	Chr 2, 179Mb	p46256	Chr 6, 35Mb	599	304	50	0.0002179
p44630	Chr 1, 87Mb	p44560	Chr 10, 84Mb	690	355	63	0.000219
p44731	Chr 10, 58Mb	p46119	Chr 10, 127Mb	500	518	66	0.0002199
p44910	Chr 11, 59Mb	p45057	Chr 17, 55Mb	397	251	32	0.0002205
p44629	Chr 1, 102Mb	p45580	Chr 9, 35Mb	317	314	32	0.0002218
p46083	Chr 4, 115Mb	p45633	Chr 8, 126Mb	209	335	25	0.0002226
p44522	Chr 6, 65Mb	p44751	Chr 17, 74Mb	150	309	19	0.0002244
p46244	Chr 2, 20Mb	p44523	Chr 9, 13Mb	1305	447	128	0.0002246
p45378	Chr 15, 6Mb	p45221	Chr 17, 90Mb	773	599	106	0.0002257
p45276	Chr 1, 146Mb	p44732	Chr 15, 32Mb	619	731	104	0.0002257
p45808	Chr 14, 94Mb	p45441	Chr 15, 6Mb	249	678	47	0.000226
p45313	Chr 2, 127Mb	p45738	Chr 11, 11Mb	267	667	49	0.0002261
p45746	Chr 2, 82Mb	p45159	Chr 8, 127Mb	325	267	29	0.0002276
p46006	Chr 6, 87Mb	p44983	Chr 11, 95Mb	118	533	23	0.0002278
p44858	Chr 2, 118Mb	p46451	Chr 17, 9Mb	468	409	52	0.0002287
p46051	Chr 11, 7Mb	p44590	Chr 14, 49Mb	229	361	28	0.0002296
p45708	Chr 6, 49Mb	p45953	Chr 18, 38Mb	280	193	21	0.00023
p45694	Chr 3, 70Mb	p46064	Chr 15, 69Mb	326	458	43	0.0002303
p44658	Chr 9, 13Mb	p44673	Chr 10, 68Mb	516	522	68	0.0002318
p45747	Chr 2, 126Mb	p44911	Chr 12, 69Mb	308	282	29	0.0002321
p44550	Chr 5, 137Mb	p45928	Chr 10, 20Mb	873	443	91	0.0002325
p45154	Chr 3, 127Mb	p45272	Chr 9, 96Mb	311	541	47	0.0002337
p45158	Chr 7, 4Mb	p45526	Chr 15, 72Mb	402	659	67	0.0002339
p44939	Chr 2, 85Mb	p45844	Chr 6, 23Mb	395	461	50	0.0002342
p44900	Chr 1, 19Mb	p45587	Chr 11, 119Mb	264	1514	92	0.0002346
p45629	Chr 9, 118Mb	p44911	Chr 12, 69Mb	498	282	41	0.0002351
p45340	Chr 1, 64Mb	p44693	Chr 15, 87Mb	609	1023	136	0.0002363
p45879	Chr 5, 61Mb	p45587	Chr 11, 119Mb	504	1514	161	0.0002368
p46359	Chr 3, 42Mb	p45059	Chr 18, 28Mb	223	1235	68	0.0002387
p45353	Chr 11, 100Mb	p44919	Chr 14, 56Mb	412	275	35	0.0002401
p45504	Chr 1, 146Mb	p44688	Chr 15, 79Mb	848	1249	216	0.0002406
p44918	Chr 14, 20Mb	p45329	Chr 15, 42Mb	648	517	81	0.0002412
p45707	Chr 6, 146Mb	p45534	Chr 18, 43Mb	1042	339	84	0.0002417
p45975	Chr 5, 47Mb	p45741	Chr 14, 12Mb	1269	684	181	0.0002435
p44739	Chr 5, 46Mb	p46162	Chr 15, 29Mb	1063	954	208	0.0002438
p45323	Chr 7, 131Mb	p45231	Chr 19, 23Mb	1390	331	104	0.0002441
p45175	Chr 1, 153Mb	p46124	Chr 19, 40Mb	539	669	86	0.0002447
p44688	Chr 15, 79Mb	p44808	Chr 19, 55Mb	1249	2367	547	0.0002459
p45099	Chr 7, 88Mb	p45577	Chr 9, 70Mb	459	460	56	0.0002459
p45975	Chr 5, 47Mb	p44688	Chr 15, 79Mb	1269	1249	310	0.0002465
p45315	Chr 2, 106Mb	p45525	Chr 14, 84Mb	408	322	39	0.000247
p46367	Chr 10, 5Mb	p44699	Chr 19, 56Mb	413	2183	184	0.0002471
p45920	Chr 1, 127Mb	p45092	Chr 5, 20Mb	616	813	113	0.0002472
p45233	Chr 2, 126Mb	p46028	Chr 5, 24Mb	433	544	61	0.0002473
p45410	Chr 5, 149Mb	p45270	Chr 9, 49Mb	1932	319	132	0.000249
p44815	Chr 2, 6Mb	p45511	Chr 10, 26Mb	2682	454	239	0.0002494
p45457	Chr 7, 64Mb	p45269	Chr 9, 34Mb	460	346	45	0.0002515
p45962	Chr 2, 84Mb	p44758	Chr 7, 58Mb	421	291	37	0.0002516
p44952	Chr 5, 26Mb	p45378	Chr 15, 6Mb	648	773	113	0.0002523
p46047	Chr 1, 37Mb	p46303	Chr 17, 15Mb	369	344	38	0.0002525
p44501	Chr 2, 153Mb	p45061	Chr 19, 6Mb	661	292	52	0.0002527
p45577	Chr 9, 70Mb	p45891	Chr 14, 6Mb	460	523	62	0.0002529
p46105	Chr 14, 93Mb	p44999	Chr 19, 31Mb	181	301	21	0.0002546
p45910	Chr 9, 53Mb	p45659	Chr 12, 9Mb	524	478	64	0.0002553
p45765	Chr 2, 121Mb	p45559	Chr 5, 127Mb	406	557	59	0.0002555
p46102	Chr 1, 114Mb	p44696	Chr 17, 11Mb	439	384	47	0.0002558
p44584	Chr 1, 9Mb	p45315	Chr 2, 106Mb	257	408	33	0.0002563
p45109	Chr 8, 73Mb	p44686	Chr 15, 59Mb	292	563	46	0.000258
p44514	Chr 2, 133Mb	p45879	Chr 5, 61Mb	468	504	61	0.000259
p45558	Chr 5, 123Mb	p45616	Chr 15, 53Mb	2000	556	223	0.0002618
p44992	Chr 1, 187Mb	p45558	Chr 5, 123Mb	731	2000	286	0.0002626
p45068	Chr 2, 71Mb	p45684	Chr 2, 149Mb	530	711	89	0.0002636
p45691	Chr 3, 104Mb	p46261	Chr 8, 58Mb	558	354	53	0.0002637
p45530	Chr 16, 99Mb	p44541	Chr 17, 45Mb	237	388	30	0.0002644
p45253	Chr 6, 32Mb	p46160	Chr 13, 73Mb	349	417	42	0.0002644
p45232	Chr 2, 101Mb	p45574	Chr 8, 83Mb	364	362	39	0.0002648
p46190	Chr 6, 78Mb	p45136	Chr 8, 104Mb	79	368	14	0.0002665
p45723	Chr 9, 50Mb	p46439	Chr 17, 92Mb	460	524	62	0.0002667
p45747	Chr 2, 126Mb	p45437	Chr 13, 116Mb	308	596	50	0.0002668
p45861	Chr 1, 66Mb	p44892	Chr 19, 52Mb	822	1109	189	0.0002688
p46143	Chr 1, 142Mb	p44593	Chr 15, 80Mb	801	1256	206	0.000269
p45130	Chr 2, 179Mb	p44875	Chr 19, 4Mb	599	733	101	0.0002719
p45753	Chr 6, 14Mb	p46098	Chr 8, 32Mb	518	447	60	0.0002759
p46033	Chr 3, 74Mb	p45161	Chr 7, 61Mb	411	528	57	0.0002762
p45181	Chr 1, 82Mb	p45324	Chr 17, 9Mb	637	349	58	0.0002764
p44502	Chr 4, 140Mb	p46028	Chr 5, 24Mb	269	544	42	0.0002788
p44632	Chr 12, 103Mb	p44795	Chr 15, 102Mb	437	748	79	0.0002794
p45695	Chr 3, 161Mb	p44550	Chr 5, 137Mb	1590	873	274	0.0002797
p44647	Chr 4, 143Mb	p45170	Chr 9, 13Mb	344	520	49	0.0002809
p45069	Chr 2, 41Mb	p45268	Chr 8, 97Mb	384	380	42	0.0002814
p45558	Chr 5, 123Mb	p44994	Chr 15, 13Mb	2000	1048	398	0.0002821
p46147	Chr 1, 173Mb	p45935	Chr 11, 27Mb	949	558	118	0.0002822
p45970	Chr 4, 149Mb	p45445	Chr 17, 94Mb	347	461	45	0.0002823
p45558	Chr 5, 123Mb	p44752	Chr 17, 33Mb	2000	447	183	0.0002836
p46192	Chr 8, 77Mb	p44482	Chr 8, 111Mb	321	2426	160	0.0002848
p45991	Chr 1, 51Mb	p45823	Chr 18, 12Mb	834	286	61	0.0002852
p45201	Chr 13, 57Mb	p45053	Chr 16, 47Mb	276	398	34	0.000286
p45850	Chr 8, 94Mb	p45026	Chr 10, 101Mb	396	932	87	0.0002865
p44758	Chr 7, 58Mb	p45210	Chr 15, 6Mb	291	650	51	0.0002866
p44735	Chr 2, 20Mb	p46098	Chr 8, 32Mb	1361	447	132	0.0002867
p45755	Chr 8, 78Mb	p44544	Chr 18, 9Mb	330	401	39	0.0002878
p45276	Chr 1, 146Mb	p44739	Chr 5, 46Mb	619	1063	142	0.0002878
p45727	Chr 9, 104Mb	p44699	Chr 19, 56Mb	507	2183	221	0.0002879
p45755	Chr 8, 78Mb	p46351	Chr 14, 89Mb	330	191	23	0.0002896
p46424	Chr 8, 40Mb	p44555	Chr 8, 72Mb	561	328	50	0.0002897
p45395	Chr 2, 70Mb	p46009	Chr 8, 68Mb	615	254	44	0.0002899
p45153	Chr 2, 119Mb	p45805	Chr 13, 47Mb	451	580	66	0.0002901
p45109	Chr 8, 73Mb	p44587	Chr 12, 95Mb	292	346	32	0.0002903
p45734	Chr 1, 153Mb	p44541	Chr 17, 45Mb	437	388	47	0.0002931
p44570	Chr 12, 108Mb	p44681	Chr 13, 107Mb	433	491	56	0.0002938
p45276	Chr 1, 146Mb	p46098	Chr 8, 32Mb	619	447	69	0.0002941
p45774	Chr 9, 117Mb	p45611	Chr 11, 27Mb	564	508	71	0.0002943
p45695	Chr 3, 161Mb	p44882	Chr 9, 56Mb	1590	616	200	0.0002962
p45924	Chr 1, 172Mb	p44688	Chr 15, 79Mb	1096	1249	271	0.0002977
p45008	Chr 1, 187Mb	p44801	Chr 17, 68Mb	622	274	47	0.0002986
p45504	Chr 1, 146Mb	p44609	Chr 5, 116Mb	848	1038	183	0.0003018
p45504	Chr 1, 146Mb	p45110	Chr 8, 38Mb	848	520	101	0.0003044
p44629	Chr 1, 102Mb	p44599	Chr 16, 38Mb	317	292	30	0.0003048
p45924	Chr 1, 172Mb	p46162	Chr 15, 29Mb	1096	954	213	0.0003049
p44774	Chr 1, 24Mb	p45161	Chr 7, 61Mb	340	528	49	0.000305
p45617	Chr 15, 89Mb	p44811	Chr 19, 52Mb	380	1141	99	0.0003084
p46282	Chr 2, 114Mb	p44744	Chr 7, 38Mb	410	216	29	0.0003093
p44480	Chr 6, 48Mb	p45324	Chr 17, 9Mb	278	349	31	0.0003094
p45923	Chr 1, 46Mb	p45297	Chr 5, 30Mb	902	825	158	0.0003103
p45646	Chr 1, 27Mb	p45482	Chr 6, 110Mb	271	161	18	0.0003112
p45857	Chr 9, 83Mb	p44811	Chr 19, 52Mb	541	1141	134	0.0003125
p45974	Chr 5, 7Mb	p45057	Chr 17, 55Mb	1874	251	104	0.000313
p44667	Chr 1, 74Mb	p44544	Chr 18, 9Mb	630	401	64	0.0003142
p44647	Chr 4, 143Mb	p44929	Chr 17, 63Mb	344	295	32	0.0003148
p45558	Chr 5, 123Mb	p45670	Chr 15, 96Mb	2000	862	332	0.0003149
p45107	Chr 8, 66Mb	p45056	Chr 17, 84Mb	219	763	46	0.0003151
p45508	Chr 1, 164Mb	p46296	Chr 14, 43Mb	385	381	42	0.0003151
p44555	Chr 8, 72Mb	p46105	Chr 14, 93Mb	328	181	22	0.0003152
p46097	Chr 8, 59Mb	p44601	Chr 17, 9Mb	281	393	34	0.000317
p46051	Chr 11, 7Mb	p45059	Chr 18, 28Mb	229	1235	69	0.000317
p46256	Chr 6, 35Mb	p44758	Chr 7, 58Mb	304	291	29	0.0003178
p46244	Chr 2, 20Mb	p45235	Chr 2, 46Mb	1305	402	116	0.0003209
p45975	Chr 5, 47Mb	p46012	Chr 9, 97Mb	1269	739	193	0.0003209
p46049	Chr 10, 48Mb	p45324	Chr 17, 9Mb	669	349	60	0.0003221
p44548	Chr 3, 98Mb	p46137	Chr 8, 58Mb	337	341	35	0.0003223
p46339	Chr 1, 145Mb	p44769	Chr 1, 193Mb	729	506	87	0.0003234
p44609	Chr 5, 116Mb	p44621	Chr 9, 100Mb	1038	589	133	0.0003234
p44774	Chr 1, 24Mb	p45746	Chr 2, 82Mb	340	325	34	0.000325
p44815	Chr 2, 6Mb	p45076	Chr 3, 140Mb	2682	410	217	0.0003254
p45580	Chr 9, 35Mb	p45653	Chr 10, 27Mb	314	439	40	0.000329
p44821	Chr 3, 149Mb	p45411	Chr 5, 38Mb	526	850	102	0.0003301
p46183	Chr 4, 49Mb	p44593	Chr 15, 80Mb	451	1256	124	0.0003311
p45264	Chr 8, 124Mb	p45809	Chr 14, 37Mb	364	366	39	0.0003323
p46009	Chr 8, 68Mb	p44696	Chr 17, 11Mb	254	384	31	0.0003352
p45633	Chr 8, 126Mb	p46166	Chr 17, 72Mb	335	265	29	0.0003353
p46116	Chr 5, 54Mb	p45656	Chr 12, 27Mb	472	422	53	0.0003357
p45092	Chr 5, 20Mb	p45270	Chr 9, 49Mb	813	319	65	0.0003362
p45910	Chr 9, 53Mb	p44602	Chr 17, 27Mb	524	578	74	0.0003368
p46341	Chr 1, 48Mb	p45671	Chr 15, 32Mb	878	714	136	0.0003378
p46339	Chr 1, 145Mb	p44843	Chr 9, 98Mb	729	556	94	0.0003385
p46316	Chr 7, 53Mb	p45726	Chr 9, 77Mb	255	543	40	0.0003395
p45008	Chr 1, 187Mb	p45630	Chr 9, 37Mb	622	216	39	0.0003396
p45017	Chr 1, 69Mb	p44901	Chr 1, 106Mb	739	357	66	0.0003398
p44814	Chr 2, 173Mb	p44966	Chr 8, 115Mb	597	449	67	0.0003409
