# Supplementary material for: Integrative Analysis Using Module-Guided Random Forests Reveals Correlated Genetic Factors Related to Mouse Weight
Source: PLoS Comput Biol. 2013 Mar 7;9(3):e1002956. doi: 10.1371/journal.pcbi.1002956 (PMC3591263; doi:10.1371/journal.pcbi.1002956)
Supplement: Table S13 — Stability score of variable importance in different methods (Group lasso, Elastic net, SVR, RF, and mgRF) with various size of |G1| in the simulation dataset. (XLSX) [file pcbi.1002956.s018.xlsx]

## Sheet: Table S7
Table S13. Stability score of variable importance in different methods (Group lasso, Elastic net, SVR, RF, and mgRF) with various size of |G1| in the simulation dataset.
|G1|	10	30	50	70	90
Group lasso	0.7155	0.6481	0.627	0.6261	0.7244
Elastic net	0.5224	0.3164	0.2488	0.2638	0.4708
SVR	0.2612	0.0986	0.107	0.1061	0.1574
RF	0.7262	0.6031	0.5075	0.5067	0.5372
mgRF	0.9392	0.9515	0.9509	0.9666	0.9574
